# Supplementary material for: Quantification of hydraulic trait control on plant hydrodynamics and risk of hydraulic failure within a demographic structured vegetation model in a tropical forest (FATES–HYDRO V1.0)
Source: Copernicus journal article supplement (doi:10.5194/gmd-16-6267-2023), 2023-11-07
Supplement: Supplementary file 1 [file gmd-16-6267-2023-supplement.zip]

Archive with 4 entries (4 files):
- traits_master_trop.csv
- Supplementary Figures.pdf
- HYDRO_DESCRIPTION_V3.pdf
- gmd-16-6267-2023-supplement-title-page.pdf
