# Supplementary material for: Quantification of hydraulic trait control on plant hydrodynamics and risk of hydraulic failure within a demographic structured vegetation model in a tropical forest (FATES–HYDRO V1.0)
Source: Copernicus journal article supplement (doi:10.5194/gmd-16-6267-2023), 2023-11-07
Supplement: Supplementary file 1 [file gmd-16-6267-2023-supplement.zip › gmd-16-6267-2023-supplement-title-page.pdf]

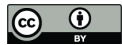

*Supplement of*

**Quantification of hydraulic trait control on plant hydrodynamics and risk of hydraulic failure within a demographic structured vegetation model in a tropical forest (FATES–HYDRO V1.0)**

**Chonggang Xu et al.**

*Correspondence to:* Chonggang Xu (cxu@lanl.gov)

- [gmd-16-6267-2023-supplement-title-page.pdf](#)
- [HYDRO\\_DESCRIPTION\\_V3.pdf](#)
- [Supplementary Figures.pdf](#)
- [traits\\_master\\_trop.csv](#)

The copyright of individual parts of the supplement might differ from the article licence.
