# Supplementary material for: Quantification of hydraulic trait control on plant hydrodynamics and risk of hydraulic failure within a demographic structured vegetation model in a tropical forest (FATES–HYDRO V1.0)
Source: Copernicus journal article supplement (doi:10.5194/gmd-16-6267-2023), 2023-11-07
Supplement: Supplementary file 1 [file gmd-16-6267-2023-supplement.zip › Supplementary Figures.pdf]

**Supplementary Figures: Quantification of hydraulic trait control on plant hydrodynamics and risk of hydraulic failure within a demographic structured vegetation model in a tropical forest (FATES-HYDRO V1.0)**

Chonggang Xu<sup>1</sup>, Bradley Christoffersen<sup>2</sup>, Zachary Robbins<sup>1</sup>, Ryan Knox<sup>3</sup>, Rosie A. Fisher<sup>4</sup>, Rutuja Chitra-Tarak<sup>1</sup>, Martijn Slot<sup>5</sup>, Kurt Solander<sup>1</sup>, Lara Kueppers<sup>3,6</sup>, Charles Koven<sup>3</sup>, Nate McDowell<sup>7,8</sup>

1: Earth and Environmental Sciences Division, Los Alamos National Laboratory, Los Alamos NM, USA

2: School of Integrative Biological and Chemical Sciences, University of Texas Rio Grande Valley, TX, USA

3: Lawrence Berkeley National Laboratory, Berkeley, CA USA

4: CICERO Centre for International Climate Research, Oslo, Norway

5: Smithsonian Tropical Research Institute, Apartado 0843-03092, Balboa, Ancon, Republic of Panama

6: Energy and Resources Group, University of California, Berkeley, CA USA

7: Atmospheric Sciences and Global Change Division, Pacific Northwest National Laboratory, Richland, WA, USA

8: School of Biological Sciences, Washington State University, Pullman, WA, USA

Corresponding author: Chonggang Xu ([cxu@lanl.gov](mailto:cxu@lanl.gov))

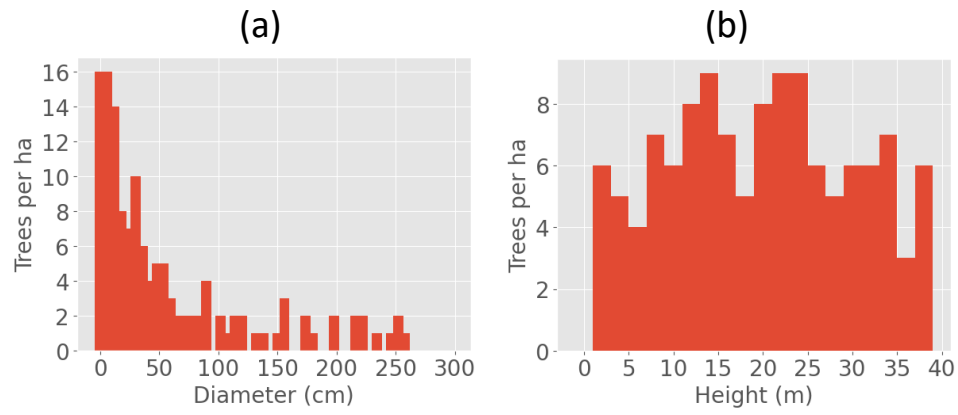

**Figure S1:** The size distribution for BCI for DBH (a) and Height (b)

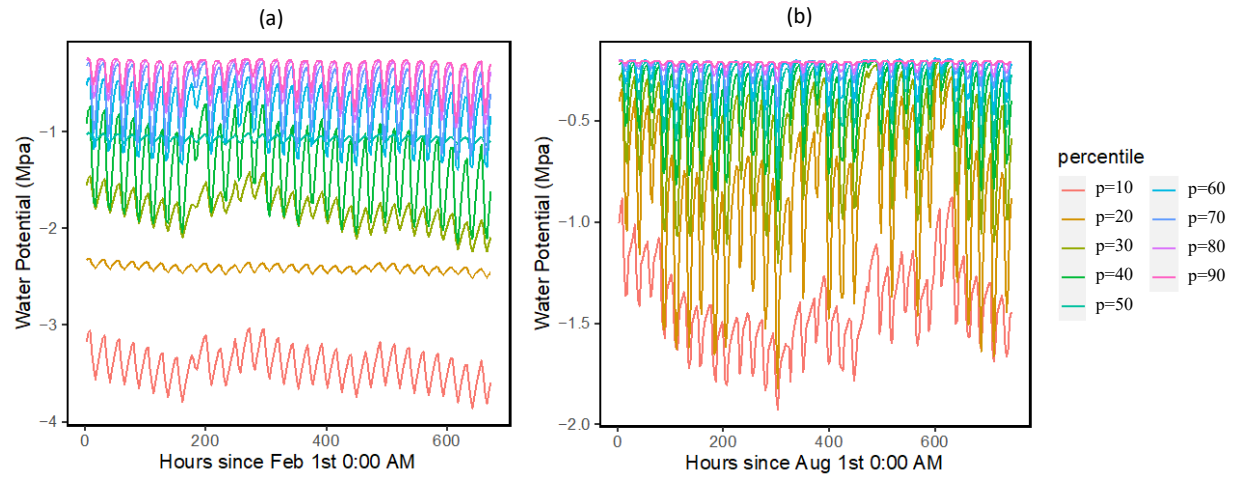

**Figure S2: Simulated ranges of leaf water potential for February (a) and August (a), 2016 for trees with DBH < 60cm.** The percentiles are calculated based on the monthly mean values of leaf water potentials for the 1000 ensemble simulations.

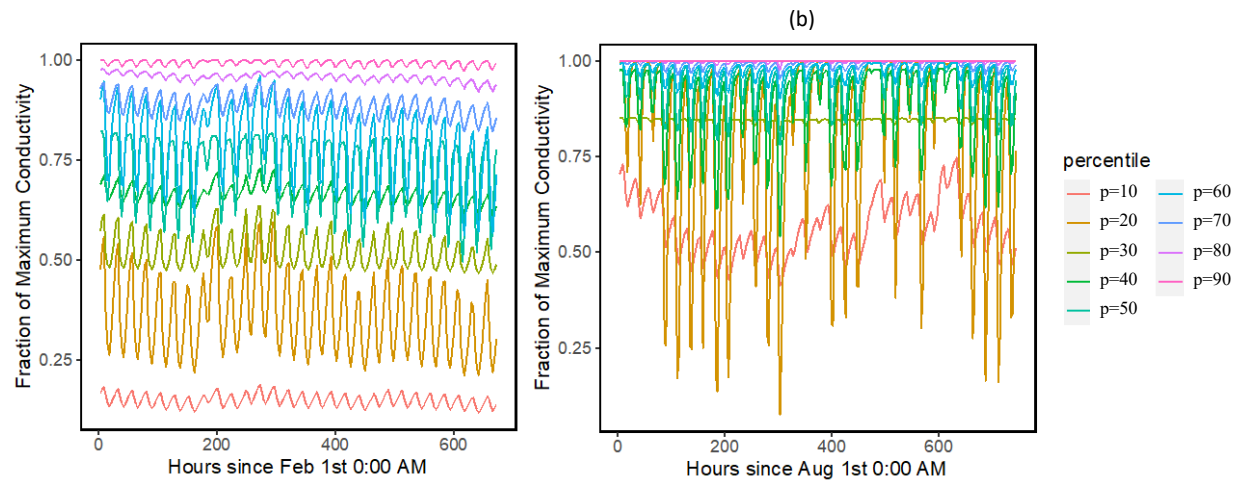

**Figure S3: Simulated ranges of fraction of maximum hydraulic conductivity of stem for February (a) and August (a), 2016 for trees with DBH < 60cm.** The percentiles are calculated based on the monthly mean values of leaf water potentials for the 1000 ensemble simulations.

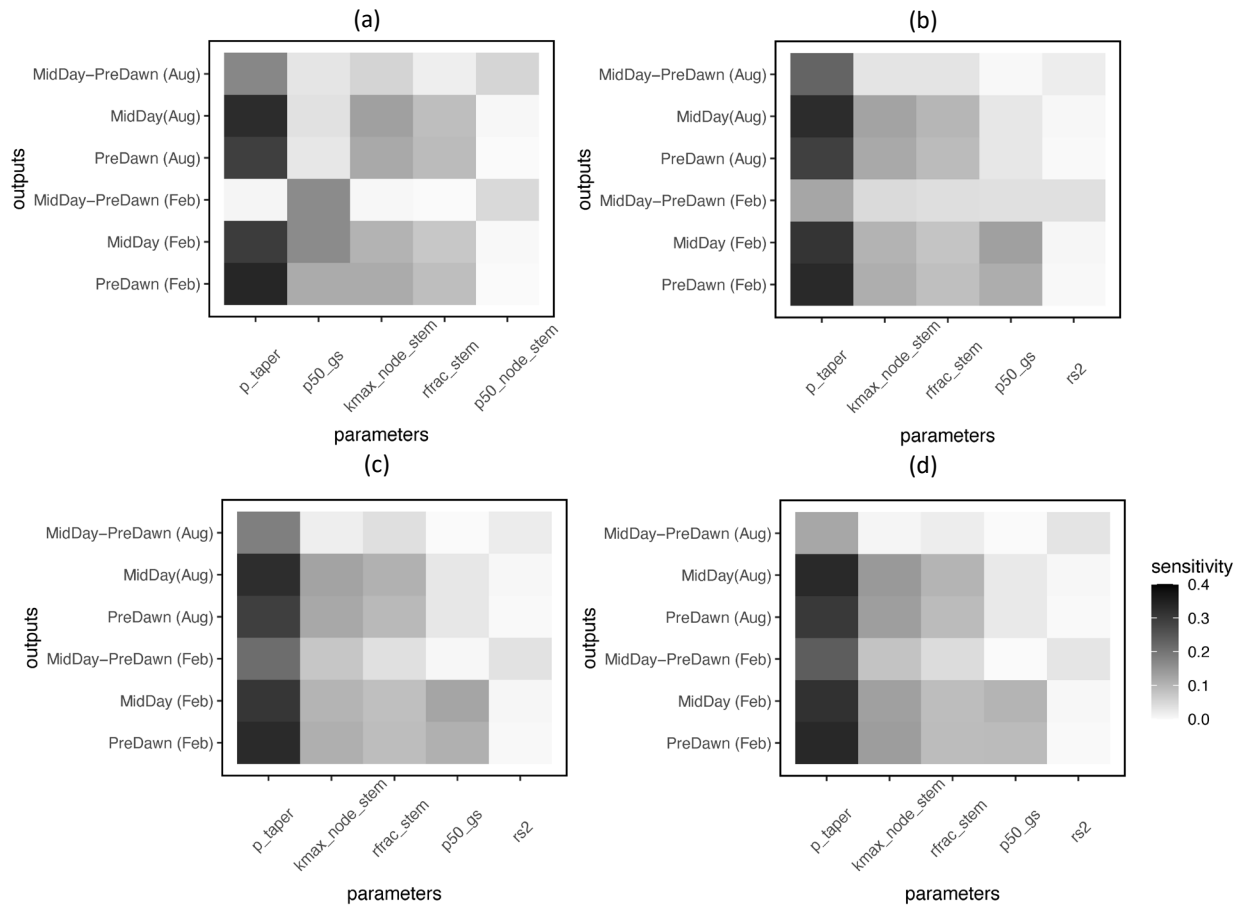

**Figure S4: Key parameters that control simulated water potentials for leaf (a), stem (b), transporting root (c) and absorbing root (d), for trees with DBH < 60cm.** The sensitivity value refers to the proportion of total model output variance contributed by a specific parameter (0-1). See Table 1 for the explanation of the parameters.

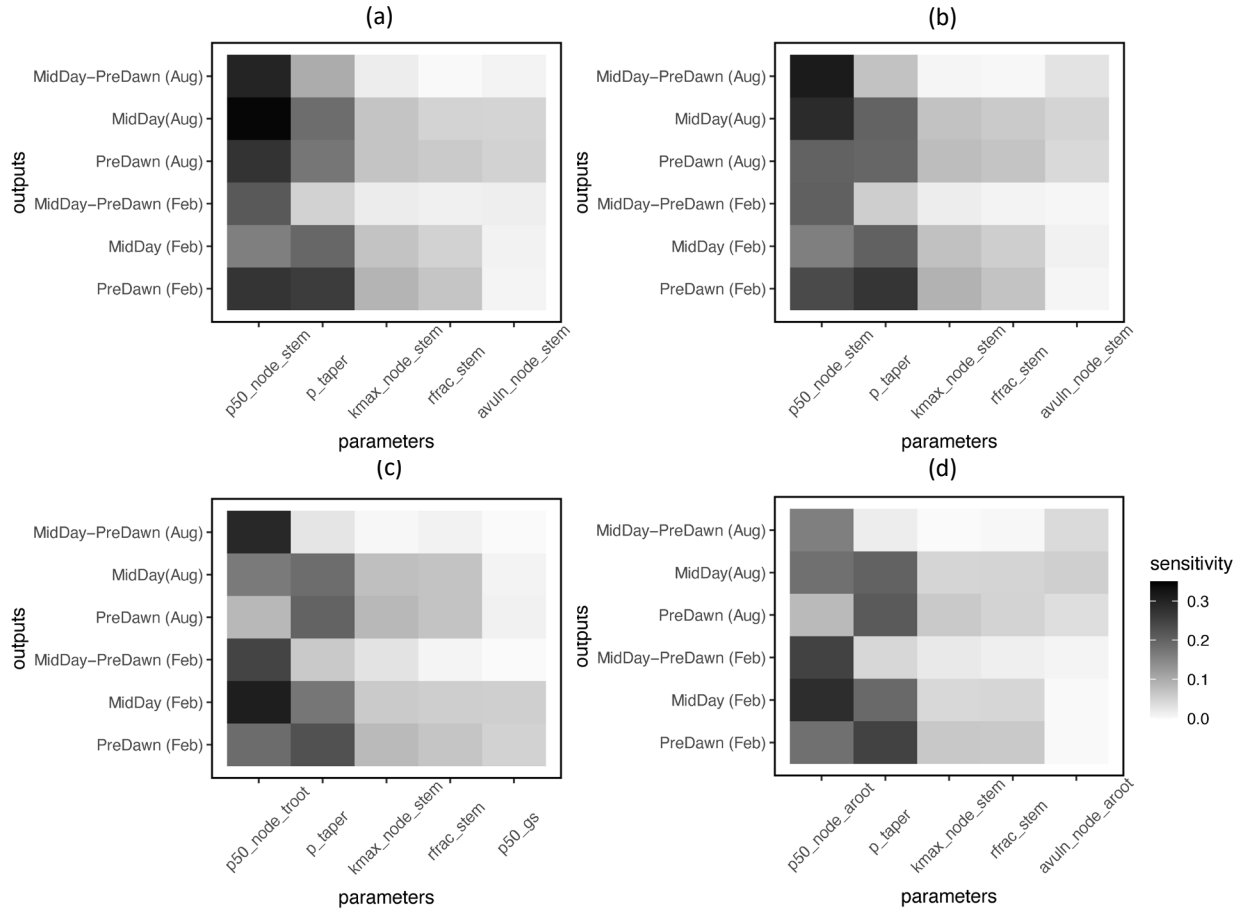

**Figure S5: Key parameters that control simulated loss of conductivity for branch (a), stem (b), transporting root (c) and absorbing root (d), for trees with DBH < 60cm.** The sensitivity value refers to the proportion of total model output variance contributed by a specific parameter. See Table 1 for the explanation of the parameters. See Table 1 for the description of parameters.
