# Supplementary material for: Quantification of hydraulic trait control on plant hydrodynamics and risk of hydraulic failure within a demographic structured vegetation model in a tropical forest (FATES–HYDRO V1.0)
Source: Copernicus journal article supplement (doi:10.5194/gmd-16-6267-2023), 2023-11-07
Supplement: Supplementary file 1 [file gmd-16-6267-2023-supplement.zip › traits_master_trop.csv]

genus	species	family	group	GrowthForm	Phenology_E_D_W	Phenology_E_D	Biome_Klein	Biome_Bartlett	Biome_Christoffersen	Biome_JansenChoat	Biome_Poulter	stom_P50	stom_Gs	stom_Amax	stom_TotalStomataDensity	stom_StomatalIndex	stom_P95	leaf_P50	leaf_LMA	leaf_d13C	leaf_thetas_node	leaf_pinot	leaf_pitlp	leaf_rttlp	leaf_epsil	leaf_apopl	leaf_LDMC	leaf_LS	leaf_rwctlp	stem_Ks	stem_Kl	stem_P12	stem_P50	stem_P88	stem_P88minusP12	stem_Slope	stem_LASA	stem_WD	stem_pinot	stem_pitlp	stem_rttlp	stem_epsil	stem_apopl	stem_thetas_node	stem_avuln	stem_rwctlp	troot_Ks	troot_Kl	troot_P12
Abarema	jupunba	Fabaceae		W		E		Tropical Moist	TMF													-1.15916666706731	-1.595426667
Abarema	macradenia	Fabaceae				E			TMF										103.843560350641		0.512739238124977
Abuta	racemosa	Menispermaceae				E			TMF										74.8482805124747		0.509184975327094
Acacia	holosericea	Fabaceae	Angiosperm	T	E				TS	TRS				29.52					132.967641293992	-26.874										4.1	0.000586967						0.880715845839498	0.577						0.625324675324675
Acacia	mangium	Fabaceae	Angiosperm	T	E				TMF	TRR				13.352					101.145999999226	-28.645										3.48	0.000521054						0.818672277300674	0.4						0.74025974025974
Acacia	melanoceras	Fabaceae				D			TMF
Acalypha	diversifolia	Euphorbiaceae				E			TMF
Acalypha	macrostachya	Euphorbiaceae				E			TMF										26.5228141155316		0.763230185761712
Acmopyle	pancheri	Podocarpaceae	Gymnosperm	T	E					TRR																				0.33	6.6e-05	-1.9788243245	-3.3795	-4.8601756755	-2.8813513515	25.861242235	0.495049504950495	0.596737687						0.612507995454545	3.4959227253273
Acosmium	cardenasii	Fabaceae	Angiosperm	T	E				TDF	TRS									58.1395348837209											1.1754	0.000216	-2.47	-6.2	-9.06	-6.59	13.28671329	0.53475935828877								3.29510489592
Acronychia	pedunculata	Rutaceae	Angiosperm	T	E			Tropical Dry	TMF	TRS			0.107383333	6.579166667					96.7075947713878	-29.031			-1.73							1.219409972	0.000165556	-0.2	-1.86	-4.12	-3.92	16.81415929	0.741999391560499	0.544268891						0.646578642207792	1.250973451176
Actinodaphne	henryi	Lauraceae	Angiosperm	T	E				TMF	TRS																												0.71						0.538961038961039
Actinostemon	schomburgkii	Euphorbiaceae	Angiosperm	T	E				TDF	TRS									38.1679389312977											0.5526	0.000126						0.452488687782805
Actinostrobus	pyramidalis	Cupressaceae	Gymnosperm	T	E					TRR																						-8.171352353	-10.72575	-13.28014765	-5.108795294	14.87630559									6.3823813872777
Adansonia	rubrostipa	Malvaceae	Angiosperm	T	D	D		Tropical Dry	TDF	TRS			1.047										-1.12															0.1						0.935064935064935
Adansonia	za	Malvaceae	Angiosperm	T	D	D		Tropical Dry	TDF	TRS			0.481										-1.26									-0.59	-1.7	-3.49	-2.9	21.22905028		0.38						0.753246753246753	1.44357541904
Adelia	triloba	Euphorbiaceae				E			TMF										45.6844234659474		0.54307757320466
Adelphia	hiraea	Malpighiaceae				E			TMF										51.9217801753203		0.562361787985366
Adenocalymma	axillare	Bignoniaceae		W		E		Tropical Dry	TS													-2.96	-3.35	0.0409999999999999	25.28				0.959
Aegiphila	cephalophora	Lamiaceae				E			TMF										41.8071476736345		0.488176002541114
Aegiphila	elata	Lamiaceae				E			TMF										70.633850303439		0.534686165216409
Aegiphila	panamensis	Lamiaceae				E			TMF
Aegiphila	verticillata	Lamiaceae	Angiosperm	T	E	E		Tropical Dry	TS	TRS									86.8999999670562			-1.065	-1.225							9.975	0.0012645						0.73015873015873	0.45						0.707792207792208
Agathis	borneeensis	Araucariaceae	Gymnosperm	T	E				TWF	TROP HEATH FOREST																						-0.74	-1.91	-3.08	-2.34	32.47863248									2.481367521472
Agathis	lanceolata	Araucariaceae	Gymnosperm	T	E					TRR																				0.95	0.000176						0.384615384615385
Aglaia	glabrata	Meliaceae	Angiosperm	T	E				TWF	TROP HEATH FOREST																							-0.71	-1.48	-1.48	49.35064935									1.40155844154
Aidia	canthioides	Rubiaceae	Angiosperm	T	E			Tropical Dry	TMF	TRS			0.124238889	6.46					69.115632629841	-30.888			-1.31							0.452331049	3.62699e-05	-0.25	-1.95	-4.55	-4.3	14.61538462	1.30695890267731	0.787112493						0.488887991558442	1.14000000036
Ailanthus	fordii	Simaroubaceae	Angiosperm	T	E				TMF	TRS																												0.57						0.62987012987013
Alangium	chinense	Cornaceae		T		D					Tropical
Albizia	guachapele	Fabaceae							TDF																													0.513	-2.02097550349533	-2.1576697004551	0.0272025616386651	21.6638721063256	0.570617156192943	0.666883116883117		0.972797438361335
Albizia	lucidior	Fabaceae	Angiosperm	T	E				TMF	TRS																												0.63						0.590909090909091
Alchornea	costaricensis	Euphorbiaceae				E			TMF										66.0822656776804		0.613717050326896
Alchornea	latifolia	Euphorbiaceae				E			TMF
Alchornea	trewioides	Euphorbiaceae	Angiosperm	S	D			Tropical Dry	TMF	TRS			0.560333333	16.33333333					45.0350076952736	-29.972			-1.32							4.490733917	0.000440032	-0.49	-0.9	-1.96	-1.47	35.8490566	1.02939965412172	0.491085786						0.681113125974026	1.2905660376
Aleurites	moluccana	Euphorbiaceae	Angiosperm	S	E	E		Tropical Dry	TDF	TRS			0.2	11.79									-1.97
Alibertia	dwyeri	Rubiaceae							TMF
Alibertia	edulis	Rubiaceae				E			TMF
Allocasuarina	torulosa	Casuarinaceae	Angiosperm	T	E				TMF	TRR				5.007					226.441844982653	-26.786										3.295	0.0008043115						0.448148891595549	0.665						0.568181818181818
Allophylus	angustatus	Sapindaceae		W		E		Tropical Moist	TMF													-1.23083333293269	-1.655053333
Allophylus	psilospermus	Sapindaceae				E			TMF										42.4814565070802		0.473575758902127
Alphitonia	excelsa	Rhamnaceae	Angiosperm	T	E				TDF	TRS			0.339	14.7344333333333					106.211897757484	-27.104										4.46333333333333	0.000909538	-2.1	-5.56	-9.05	-6.95	10.88825215	0.512065095398428	0.56						0.636363636363636	2.42154727816
Alphitonia	whitei NA	Rhamnaceae							TMF																												3.798602876
Alphonsea	mollis	Annonaceae	Angiosperm	W	E	E		Tropical Dry	TDF	TRR												-1.875	-2.2							3.67	0.000387	-0.33	-1.82	-3.31	-2.99	25.42958221	0.936329588014981	0.58						0.623376623376623	1.851273584888
Alseis	blackiana	Rubiaceae		W		E		Tropical Moist	TMF										28.57142857		0.726305422383625	-1.14425766	-2.04
Alseodaphne	andersonii	Lauraceae	Angiosperm	T	E				TMF	TRS																												0.57						0.62987012987013
Alstonia	muelleriana NA	Apocynaceae							TMF																												4
Alstonia	rostrata	Apocynaceae	Angiosperm	T	E				TMF	TRS																												0.53						0.655844155844156
Alstonia	scholaris	Apocynaceae		T		E			TWF		Tropical																0.323	3473.125									0.379756494393715	0.3325						0.784090909090909
Alzatea	verticillata	Alzateaceae							TWF
Amaioua	glomerulata	Rubiaceae				E			TMF
Amborella	trichopoda	Amborellaceae	Angiosperm	S	E	E		Tropical Moist	TWF	TRR			0.201	7.9									-1.1							0.54	0.00013	-2.21	-3	-4.07	-1.86	35.51401869	0.425531914893617								4.2616822428
Ampelocera	ruizii	Ulmaceae	Angiosperm	T	E				TDF	TRS									62.111801242236											3.6	0.000342						1.00704934541793	0.648						0.579220779220779
Amphilophium	crucigerum	Bignoniaceae				E			TMF
Amphilophium	paniculatum	Bignoniaceae				E			TMF										47.1641567393422		0.546606918979349
Amphipterygium	adstringens	Anacardiaceae	Angiosperm	T					TDF	TRS									40											5.36			-0.96					0.48						0.688311688311688
Amyxa	pluricornis	Thymelaeaceae	Angiosperm	T	D				TWF	TRR																							-0.63	-1.5	-1.5	43.67816092		0.63						0.590909090909091	1.100689655184
Anacardiaceae		Anacardiaceae							TWF
Anacardium	excelsum	Anacardiaceae	Angiosperm	T	E	E		Tropical Dry	TMF	TRS			0.064						92.7528381691712		0.662532535622019	-0.8692882625	-1.0625							1.1	0.0051	-0.9	-1.4775	-2.5	-1.6	39.40740741	0.510001122002468	0.416880952380952	-1.16986601036672	-1.32505027780618	0.121438675439534	9.98897186943953	0.335948587647556	0.729298082869511	2.328977777931	0.878561324560466
Anacardium	nanum	Anacardiaceae		W		D		Tropical Dry	TS													-1.36	-1.45	0.033	12.76				0.967
Anadenanthera	colubrina	Fabaceae	Angiosperm	T	E				TDF	TRS									63.6942675159236											2.628	0.000414	-3.84	-5.7	-7.48	-3.64	21.34831461	0.625	0.866142857142857						0.437569573283859	4.86741573108
Anadenanthera	peregrina	Fabaceae		W		D		Tropical Dry	TS													-2.25	-2.6	0.101	26.1				0.899
Anaxagorea	panamensis	Annonaceae				E			TMF
Andira	inermis	Fabaceae							TMF										73.7244324567318		0.572737983165878
Aniba		Lauraceae							TWF
Aniba	muca	Lauraceae							TWF
Annona	acuminata	Annonaceae				E			TMF										64.5650708024275		0.708381127868545
Annona	coriacea	Annonaceae		W		E		Tropical Dry	TS										149			-2.16	-2.35	0.075	23.71				0.925
Annona	glabra	Annonaceae	Angiosperm	T	E					TRR			0.3		432				97.3709834469328											9.1	0.0018	-0.01	-3.3	-5.4	-5.39	18.0952381	0.285714285714286	0.315						0.795454545454545	2.3885714292
Annona	herzogii	Annonaceae	Angiosperm	T	E				TDF	TRS									87.719298245614											3.042	0.000774						0.37593984962406
Annona	spraguei	Annonaceae				D			TMF										61.7835468644639		0.498737885286981
Anthodon	decussatum	Celastraceae				E			TMF
Antiaris	toxicaria	Moraceae	Angiosperm	T	D				TMF	TRS																												0.4						0.74025974025974
Apeiba	glabra	Malvaceae		W		E		Tropical Moist	TMF													-1.66666666706731	-2.017666667
Apeiba	membranacea	Malvaceae				D			TMF										90.4323068854424		0.577449177175641
Apeiba	tibourbou	Malvaceae				D			TMF										72.0386603731175		0.398096450618441
Aphelandra	sinclairiana	Acanthaceae				E			TMF
Apoplanesia	paniculata	Fabaceae	Angiosperm	T					TDF	TRS									53.99999999568											0.99			-4.61					0.56						0.636363636363636
Aporosa		Phyllanthaceae							TWF
Aporosa	dioica	Phyllanthaceae	Angiosperm	T	E			Tropical Dry	TMF	TRS			0.070953333	4.310666667					53.1533840399608	-29.788			-0.97							0.708623512	0.000117069	-0.19	-1.43	-2.52	-2.33	34.86238532	0.6532446662573	0.568759426						0.630675697402597	1.994128440304
Aporosa	elmeri	Phyllanthaceae							TWF
Aporosa	globifera	Phyllanthaceae	Angiosperm			E		Tropical Dry											34			-1.15	-1.475		7.57	0.193
Aporosa	microstachya	Phyllanthaceae	Angiosperm	W		E		Tropical Moist	TMF										45			-1.49	-1.68		24.87	0.466
Aporosa	symplocoides	Phyllanthaceae	Angiosperm	W		E		Tropical Moist	TWF										43			-1.15	-1.22		9.46	0.252
Appunia	seibertii	Rubiaceae							TMF
Archidendropsis	basaltica	Fabaceae	Angiosperm	T	D				TS	TRS				21.28					172.565756204267	-25.352										4.26	0.000756813						0.68747894595728	0.735						0.522727272727273
Ardisia	bartlettii	Primulaceae				E			TMF
Ardisia	copeyana	Primulaceae				E			TMF
Ardisia	guianensis	Primulaceae				E			TMF
Ardisia	palmana	Primulaceae	Angiosperm	T	E				TWF	TRR																				0.23	0.00062						0.0480769230769231
Ardisia	quinquegona	Primulaceae	Angiosperm	S	E			Tropical Dry	TMF	TRS			0.079520833	6.549166667					64.9190548844049	-33.432			-1.93							0.495324469	5.45569e-05	-0.22	-2.88	-6.54	-6.32	10.38251366	0.95999692800983	0.624309996						0.594603898701299	1.196065573632
Argyrodedron	trifoliolatum NA	Malvaceae							TMF																												4.02475374
Argyrodendron	peralatum	Malvaceae							TWF																		0.5045	2506.975									0.585106301760687	0.81						0.474025974025974
Artocarpus	anisophyllus	Moraceae							TWF
Artocarpus	lacucha	Moraceae	Angiosperm	T	D				TMF	TRS																												0.65						0.577922077922078
Artocarpus	styracifolius	Moraceae		T							Tropical
Ascarina	rubricaulis	Chloranthaceae	Angiosperm			D		Tropical Moist															-1.4
Ascarina	solmsiana	Chloranthaceae	Angiosperm			D		Tropical Moist															-0.75
Aspidosperma	album	Apocynaceae							TWF
Aspidosperma	cylindrocarpon	Apocynaceae	Angiosperm	T	D				TDF	TRS									86.9565217391304											2.484	0.000306	-1.18	-2.9	-4.37	-3.19	25.85034014	0.775193798449612	0.636666666666667						0.586580086580086	2.99863945624
Aspidosperma	desmanthum	Apocynaceae	Angiosperm	T		E		Tropical Moist	TWF	TRR				9.7								-2.32986071	-2.782178							1.556485	0.0002844						1.1599999536	0.7						0.545454545454545
Aspidosperma	excelsum	Apocynaceae		W		E		Tropical Moist	TMF													-1.71083333293269	-1.743106667
Aspidosperma	spruceanum	Apocynaceae				E			TMF										158.192852326365		0.533788572835541
Aspidosperma	tomentosum	Apocynaceae	Angiosperm	T	E	E		Tropical Dry	TS	TRS									100.079928958449			-2.39	-2.88	0.118	20.94				0.882	2.61966666666667	0.000613333333333333	-1.91	-4.7	-6.77	-4.86	18.35748792	0.446428571428571	0.683666666666667						0.556060606060606	3.45120772896
Asplenium	cuspidatum	Aspleniaceae		F		E		Tropical Moist														-1.24	-1.37	0.0590000000000001	35.3				0.941
Astrocaryum	standleyanum	Arecaceae				E			TMF
Astronium	graveolens	Anacardiaceae		W		D		Tropical Dry	TDF										58.9		0.510976445163906	-1.15	-2.07														0.253807106598985	0.492						0.680519480519481
Austrobaileya	scandens	Austrobaileyaceae	Angiosperm			E		Tropical Moist															-1.3
Avicennia	germinans	Acanthaceae	Angiosperm	T	E					TRR																												0.7764						0.495844155844156
Baccaurea		Phyllanthaceae							TWF
Baccaurea	deflexa	Phyllanthaceae							TWF
Baccaurea	kunstleri	Phyllanthaceae							TWF
Baccaurea	pendula	Phyllanthaceae							TWF
Baccaurea	ramiflora	Phyllanthaceae	Angiosperm	T	E	E		Tropical Dry	TMF	TRS			0.13	4.96					73.1689470988512			-1.07	-1.28							0.74	0.00037	-0.33	-2	-4.11	-3.78	18.00947867	0.199203187250996	0.565						0.633116883116883	1.4407582936
Balfourodendron	riedelianum	Rutaceae	Angiosperm	T	D	D		Tropical Moist	STF	TRR									52.6315789473684			-1.86	-2.27							0.21	0.0013		-1.13	-2.57			1.72000103200062	0.7185						0.533441558441558
Banisteriopsis	cornifolia	Malpighiaceae				E			TMF
Barringtonia	fusicarpa	Lecythidaceae	Angiosperm	T	E				TMF	TRS																												0.63						0.590909090909091
Barringtonia	pendula	Lecythidaceae		W		E		Tropical Dry	TMF													-0.8125237595	-1.268901333
Barringtonia	racemosa	Lecythidaceae	Angiosperm	T	D				G	TRR																				3.27869	0.00021	-0.8	-1.36	-1.8	-1	86.36363636	1.63392819212381	0.454						0.705194805194805	4.698181817984
Bauhinia	megalandra	Fabaceae		W		D		Tropical Dry	TDF										29.5
Bauhinia	rufa	Fabaceae		W		D		Tropical Dry	TS										143			-1.52	-1.98	0.146	8.03				0.854
Bauhinia	variegata	Fabaceae	Angiosperm	T	D	D		Tropical Dry	TMF	TRS			0.21	10.28					45.7603075092665			-1.54	-1.93	0.28	5.04				0.72	5.46	0.000605295	-0.37	-1.205	-4.01	-5.61	20.451809097	0.921089251986092	0.485						0.685064935064935	0.9857771984754
Beilschmiedia		Lauraceae							TWF
Beilschmiedia	pendula	Lauraceae				E			TMF										135.72338353188		0.716928009804606
Bignonia	aequinoctialis	Bignoniaceae				E			TMF
Bignonia	corymbosa	Bignoniaceae				E			TMF
Bischofia	javanica	Phyllanthaceae	Angiosperm	S	D	D		Tropical Dry	TDF	TRS			0.28	14.35
Blastus	cochinchinensis	Melastomataceae	Angiosperm	S	E			Tropical Dry	TMF	TRS			0.105738095	3.831428571					50.6766882250113	-31.069			-1.25							1.418738186	0.00018992	-1.77	-4.26	-6.4	-4.63	17.75700935	0.770309202113729	0.531247962						0.655033790909091	3.02579439324
Blepharocalyx	salicifolius	Myrtaceae	Angiosperm	T	D	D		Tropical Dry	TS	TRS			0.198666666666667						78.1474785202692	-28.093541665			-2.515625							3.6075	0.00072125	-0.22	-2.03	-4.265	-4.155	17.2295088875	0.514494980152137	0.461666666666667	-1.35462642894473	-1.56365681562532	0.137700585308244	10.1333154565813	0.305266507446258	0.70021645021645	1.399036121665	0.862299414691756
Bocoa	prouacensis	Fabaceae		W		E		Tropical Moist	TMF													-1.84892857142857	-2.08046285714286
Boswellia	balsamifera	Burseraceae							TWF
Bougainvillea	modesta	Nyctaginaceae	Angiosperm	T	E				TDF	TRS									66.2251655629139											0.6534	0.000144	-2.14	-3.7	-5.84	-3.7	17.75700935	0.432900432900433								2.6280373838
Bowdichia	virgilioides	Fabaceae		W		E		Tropical Dry	TS										168			-2.09	-2.5	0.175	18.25				0.825
Brachychiton	australis	Malvaceae	Angiosperm	T	D				TDF	TRS			0.309	8.85					74.4047619047619											6.46	0.002019	-1.2	-3.17	-5.15	-3.95	19.19191919	0.313479623824451	0.25						0.837662337662338	2.433535353292
Bracteocarpus	compactus	Podocarpaceae	Gymnosperm	S	E					TRR																						-2.26	-3.1	-3.92	-1.66	46.34146341									5.74634146284
Bridelia	glauca	Phyllanthaceae							TWF
Brosimum	alicastrum	Moraceae				D			TMF										114.108039259759		0.575031445113428
Brosimum	guianense	Moraceae				E			TMF
Brosimum	rubescens	Moraceae		W		E		Tropical Moist	TMF													-1.98166666706731	-2.279746667
Bubbia	queenslandiana	Winteraceae	Angiosperm	T	E					TRR																						-1.37	-3.6	-5.98	-4.61	15.96638655									2.2991596632
Bubbia	semecarpoides	Winteraceae	Angiosperm	T	E					TRR																						-2.25	-3.27	-4.15	-1.9	43.18181818		0.408366						0.734827272727273	5.648181817944
Bursaria	spinosa	Pittosporaceae	Angiosperm			E		Tropical Dry											132.1			-2.24	-2.99		7.84
Bursera	heteresthes	Burseraceae	Angiosperm	T					TDF	TRS									61.99999999256											10.24			-1.36					0.4						0.74025974025974
Bursera	instabilis	Burseraceae	Angiosperm	T					TDF	TRS									61.99999999256											15.4			-2.54					0.4						0.74025974025974
Bursera	simaruba	Burseraceae	Angiosperm	T	E	D	Trs	Tropical Dry	TDF	TRS		-1.220273702					-1.808928051		66.4581317957412			-0.84872176	-1.04							3.55	0.000214	-0.3	-1	-1.7	-1.4	54.28571429	1.85185185185185	0.305						0.801948051948052	2.1714285716
Byrsonima	crassa	Malpighiaceae	Angiosperm	T	D				TS	TRS			0.3385																									0.525						0.659090909090909
Byrsonima	crassifolia	Malpighiaceae	Angiosperm	T	E				TDF	TRS																				2.1	0.000225						1.20481927710843	0.584						0.620779220779221
Byrsonima	laxiflora	Malpighiaceae	Angiosperm	T	E				TS	TRS			53.26																								0.283733018578838	0.55987526						0.636444636363636
Byrsonima	pachyphylla	Malpighiaceae	Angiosperm	T	E				TS	TRS			141.67																								0.187055392713444	0.549480249						0.643194643506493
Byrsonima	sericea	Malpighiaceae		W		E		Tropical Dry	STF													-1.54	-2.03		9.45
Cabralea	canjerana	Meliaceae	Angiosperm	T	D				STF	TRR																												0.5036						0.672987012987013
Caesalpinia	sclerocarpa	Fabaceae	Angiosperm	T					TDF	TRS									58.00000000116											2.6			-2.51					0.71						0.538961038961039
Callerya	atropurpurea	Fabaceae	Angiosperm	W		E		Tropical Moist	TMF										44.5			-1.01	-1.12		19.59	0.478
Callichlamys	latifolia	Bignoniaceae				E			TMF										60.9125646212632		0.777183732833429
Callista	tortilis	Orchidaceae		H				Tropical Moist														-0.69	-0.82	0.09006	19.4	0.43			0.90994
Callitris	acuminata	Cupressaceae	Gymnosperm	T	E					TRR																						-11.05	-14.1
Callitris	columellaris	Cupressaceae		Tree			Trs					-1.8
Calophyllum	longifolium	Calophyllaceae				E			TMF										199.235783322095		0.598221680391514
Calycophyllum	candidissimum	Rubiaceae	Angiosperm	T	D	D	Trs	Tropical Dry	TDF	TRS		-1.447786211					-2.008712968					-1.071003907	-1.3							1.11	0.000137	-1.2	-2.87	-4.3	-3.1	26.57342657	1.05263157894737	0.696666666666667	-2.6675045916348	-2.90400403589644	0.0245868144233529	26.0835155280523	0.698095661331608	0.547619047619047	3.050629370236	0.975413185576647
Campomanesia		Myrtaceae		W				Tropical Dry	TS													-2.63	-3	0.1	27.96				0.9
Campomanesia	aromatica	Myrtaceae		W		E		Tropical Dry	TS										149			-2.31	-2.7	0.063	23.92				0.937
Canarium	australianum	Burseraceae	Angiosperm	T	D				TMF	TRR				8.885						-29.864										3.26	0.000517318						0.728395781131636	0.45						0.707792207792208
Canarium	caudatum	Burseraceae	Angiosperm	T	D				TWF	TROP HEATH FOREST																						-0.14	-1.47	-2.8	-2.66	28.57142857		0.33						0.785714285714286	1.679999999916
Canella	winterana	Canellaceae	Angiosperm			E		Tropical Dry															-3
Capparidastrum	frondosum	Capparaceae				E			TMF
Capparidastrum	petiolare	Capparaceae	Angiosperm	T	E				TDF	TRS									91.743119266055											0.6318	7.2e-05						0.714285714285714
Capparis		Capparaceae		TropicalDry		E		Tropical Dry	TDF										173.75			-2.83	-3.28		15.95	0.13
Caradeviejo	NA								TWF
Carapa	guianensis	Meliaceae							TWF										156.739811912226																		0.490038502357143
Carapa	procera	Meliaceae		W		E		Tropical Moist	TMF													-1.59683333341346	-1.92684
Cardwellia	sublimis NA	Proteaceae							TMF																												3.8569852
Cariniana	ianeirensis	Lecythidaceae							TMF																												0.870903113965563
Carissa	spinarum	Apocynaceae	Angiosperm	S	E				TS	TRS				14.81					127.380413240472	-28.024										2.38	0.000826253						0.378671695426782	0.684						0.555844155844156
Carpinus	viminea	Betulaceae		W		D		Tropical Dry	STF													-2.14	-2.625	0.1895					0.8105
Caryocar	brasiliense	Caryocaraceae	Angiosperm	T	D	E		Tropical Dry	TS	TRS			0.1934						71.5358670403799	-26.6925000025		-1.71	-2.2	0.152	11.34				0.848	3.2075	0.0009745	-0.396666666666667	-1.775	-3.6425	-3.345	26.195276185	0.34681633588798	0.402	-1.25875245943101	-1.31823294815421	0.105943800781387	27.8970297859187	0.0886035218427126	0.738961038961039	1.859864609135	0.894056199218613
Caryocar	glabrum	Caryocaraceae		W		E		Tropical Moist	TWF													-1.3075	-1.5798466665			0.28
Casearia	aculeata	Salicaceae				E			TMF										105.079793211958		0.604720821737767
Casearia	arborea	Salicaceae				D			TMF										68.5996853225444		0.645135406108356
Casearia	commersoniana	Salicaceae				E			TMF
Casearia	gossypiosperma	Salicaceae	Angiosperm	T	D				TDF	TRS									40.8163265306123											2.178	0.000306	-2.37	-4.6	-6.93	-4.56	16.30901288	0.689655172413793								3.00085836992
Casearia	guianensis	Salicaceae				D			TMF
Casearia	sylvestris	Salicaceae		W		E		Tropical Dry	TS										62.8		0.709469303237462	-2.46	-2.73	0.093	26.27				0.907
Cassipourea	elliptica	Rhizophoraceae	Angiosperm	T	E	E			TMF	TRR									114.857271296921		0.658499008332084											-1.4	-4.68	-6.6	-5.2	19.79166667									3.705000000624
Cassipourea	guianensis	Rhizophoraceae		W		E		Tropical Moist	TMF													-1.4875	-2.054413333
Castanopsis	chinensis	Fagaceae	Angiosperm	T	E			Tropical Dry	TMF	TRS			0.226483333	11.74166667					100.430999725711	-30.807			-2.33							3.85206653	0.00035385	-1.06	-3.04	-9.27	-8.21	6.099518459	1.23020295888416	0.539372316						0.649758236363636	0.7417014446144
Castanopsis	fissa	Fagaceae	Angiosperm	T	E			Tropical Dry	TMF	TRS			0.21335	10.11083333					94.3841434638981	-30.691			-2.35							6.776017431	0.000710019	-0.21	-1.37	-3.14	-2.93	21.46892655	0.96825104813176	0.503888135						0.672799912337662	1.17649717494
Castanospermum	australe	Fabaceae							TWF																		0.415	3831.6									0.263492326606164	0.625						0.594155844155844
Catostemma	sancarlosianum	Malvaceae		W		E		Tropical Moist	TWF													-1.6	-1.89	0.0456		0.43			0.9544
Cavanillesia	platanifolia	Malvaceae				D			TMF										73.5745860492995		0.866229049020321
Cayaponia	granatensis	Cucurbitaceae				D			TMF										53.6075522589346		0.676467312709524
Cecropia	concolor	Urticaceae	Angiosperm	T	E				TDF	TRS									57.4712643678161											4.986	0.000864	-0.37	-0.8	-1.43	-1.06	60.31746032	0.53475935828877	0.15						0.902597402597403	1.93015873024
Cecropia	insignis	Urticaceae				E			TMF										137.390424814565		0.706782107695865
Cecropia	longipes	Urticaceae	Angiosperm	T		D			TMF	TRS									46.0215778826703		0.799661201232957																0.33999959200049	0.33						0.785714285714286
Cecropia	montana	Urticaceae							TWF
Cecropia	obtusifolia	Urticaceae				E			TMF										68.7795010114633		0.939408025742998
Cedrela	fissilis	Meliaceae	Angiosperm	T	D	D		Tropical Moist	STF	TRR									32.0512820512821			-1	-1.28							2.16	0.0081	-0.335	-0.73				2.53999862840074	0.4908						0.681298701298701
Cedrela	odorata	Meliaceae				D			TMF																												0.23696682464455	0.435						0.717532467532467
Ceiba	pentandra	Malvaceae				D			TMF										132.703978422117		0.54429213896795
Ceiba	samauma	Malvaceae	Angiosperm	T	D				TDF	TRS									43.1034482758621											6.93	0.000774						0.869565217391304
Ceiba	speciosa	Malvaceae	Angiosperm	T	D				TDF	TRS									40											7.29	0.000918	-0.68	-1.4	-2.6	-1.92	31.66666667	0.793650793650794	0.3909						0.746168831168831	1.77333333352
Celtis	iguanaea	Cannabaceae				E			TMF
Celtis	philippensis	Cannabaceae	Angiosperm	W	E	E		Tropical Dry	TDF	TRR												-2.705	-2.98							1.96	0.000355	-0.11	-1.5	-2.89	-2.79	27.24598094	0.56315819113589	0.62						0.597402597402597	1.6347588564
Celtis	philippensis var. wightii	Cannabaceae		W		E		Tropical Dry	TMF													-2.89	-3.115
Celtis	schippii	Cannabaceae				E			TMF										82.237581478984		0.638637094551803
Celtis	timorensis	Cannabaceae	Angiosperm	T	E				TMF	TRS																												0.58						0.623376623376623
Centrolobium	microchaete	Fabaceae	Angiosperm	T	D				TDF	TRS									41.6666666666667											9.126	0.000954	-0.23	-1.2	-3.17	-2.94	19.2893401	0.934579439252336	0.586666666666667						0.619047619047619	0.9258883248
Ceratopelatum	sucirubrum NA	Cunoniaceae							TMF																												3.815308569
Cestrum	megalophyllum	Solanaceae				E			TMF
Chamanare	NA								TWF
Chamguava	schippii	Myrtaceae				E			TMF										95.751854349292		0.517288037584388
Chimarrhis	parviflora	Rubiaceae				E			TMF										52.9332434254889		0.663395250146381
Chionanthus	ramiflorus	Oleaceae	Angiosperm	T	E				TMF	TRR				4.182					117.948999993206	-28.558										2.37	0.00036934						0.810333371148891	0.56						0.636363636363636
Chrysochlamys	eclipes	Clusiaceae				E			TMF
Chrysophyllum	argenteum	Sapotaceae				E			TMF										136.360230763467		0.62550016192852
Chrysophyllum	cainito	Sapotaceae	Angiosperm	T	E	E		Tropical Moist	TMF	TRS				9.9					69.9300699300699		0.484093363711299	-2.430152331	-2.900261354							5.096234	0.0006084	-0.4	-2.1				0.9000009000009	0.6325						0.589285714285714
Chrysophyllum	gonocarpum	Sapotaceae	Angiosperm	T	E				STF	TRR																												0.6728						0.563116883116883
Chrysophyllum	sanguinolentum	Sapotaceae		W		E		Tropical Moist	TMF													-0.98125	-1.4474
Chukrasia	tabularis	Meliaceae	Angiosperm	T	D				TMF	TRS																												0.74						0.519480519480519
Cinnamomum	camphora	Lauraceae	Angiosperm	T	E				G	TRR																				1.44262	0.00017	-0.8	-1.24	-1.7	-0.9	82.60869565	0.831815270464735	0.4874						0.683506493506494	4.09739130424
Cinnamomum	triplinerve	Lauraceae				E			TMF										116.177792762419		0.556695566470711
Cipadessa	baccifera	Meliaceae	Angiosperm	W	D	D		Tropical Dry	TDF	TRR												-1.525	-1.78							3.65	0.00048015	-0.2	-2.45	-4.7	-4.5	16.87804129	0.76728305071741	0.55						0.642857142857143	1.65404804642
Cissus	erosa	Vitaceae				E			TMF
Citrus	clementina	Rutaceae		Tree			Trs					-1.7
Citrus	volkameriana	Rutaceae		T		E					Tropical
Clarisia	biflora	Moraceae							TWF
Cleistanthus	sumatranus	Phyllanthaceae	Angiosperm	W		E		Tropical Dry	TDF													-2.13	-2.435
Clerodendrum	fortunatum	Lamiaceae	Angiosperm	S	D			Tropical Dry	TMF	TRS			0.500444444	13.43333333					61.2805973103161	-30.201			-1.54							3.966645989	0.000744502	-0.15	-1.89	-3.99	-3.84	18.0952381	0.551562853344953	0.436888098						0.71630642987013	1.36800000036
Clidemia	dentata	Melastomataceae							TMF										42.2566868959317		0.53260055122577
Clidemia	octona	Melastomataceae				E			TMF										38.2108338952574		0.367616797389156
Clidemia	septuplinervia	Melastomataceae				E			TMF
Clitoria	javitensis	Fabaceae				E			TMF
Clusia	stenophylla	Clusiaceae	Angiosperm	T	E				TWF	TRR																				0.12	0.00013						0.0862068965517241
Clusia	uvitana	Clusiaceae	Angiosperm	S	E				TMF	TRR																				1.07	0.000189	-0.6	-1.3	-2.6	-2	29.23076923									1.51999999996
Cnestidium	rufescens	Connaraceae				E			TMF
Cnidoscolus	spinosus	Euphorbiaceae	Angiosperm	T	D					TRS																				3								0.31						0.798701298701299
Coccoloba	coronata	Polygonaceae				E			TMF										69.1166554281861		0.581948381817006
Coccoloba	manzinellensis	Polygonaceae				E			TMF
Coccoloba	parimensis	Polygonaceae				E			TMF										71.3924477410654		0.530989528529949
Cochlospermum	vitifolium	Bixaceae	Angiosperm	T					TDF	TRS									64																			0.27						0.824675324675325
Codiaeum	variegatum	Euphorbiaceae	Angiosperm	S	E	E		Tropical Dry	TDF	TRS			0.13	7.22																0.86	0.000171	-1.2	-2.23	-3.27	-2.07	36.53846154		0.49						0.681818181818182	3.259230769368
Coffea	arabica	Rubiaceae	Angiosperm	S	E			Tropical Moist	G	TRS			0.0936666666666667									-1.48	-1.82
Cojoba	rufescens	Fabaceae				E			TMF
Colubrina	glandulosa	Rhamnaceae				E			TMF
Combretum	decandrum	Combretaceae				D			TMF
Combretum	fruticosum	Combretaceae				D			TMF
Combretum	latifolium	Combretaceae	Angiosperm	W		E		Tropical Dry	TMF													-0.94	-1.29
Combretum	laxum	Combretaceae				E			TMF										100.134861766689		0.546615737530438
Combretum	leprosum	Combretaceae	Angiosperm	T	E				TDF	TRS									71.9424460431655											5.382	0.000594						0.892857142857143	0.63						0.590909090909091
Conceveiba	guianensis	Euphorbiaceae		W		E		Tropical Moist	TMF													-1.28	-1.69596
Connarus	suberosus	Connaraceae		W		E		Tropical Dry	TS										149			-2.25	-2.63	0.083	18.01				0.917
Connarus	turczaninowii	Connaraceae				E			TMF
Conocarpus	erectus	Combretaceae	Angiosperm	T	E					TRR																												0.845						0.451298701298701
Conostegia	bracteata	Melastomataceae				E			TMF
Conostegia	cinnamomea	Melastomataceae				E			TMF
Cordia	africana	Boraginaceae		Tree			Trs					-0.6
Cordia	alliodora	Boraginaceae	Angiosperm	T	D	D		Tropical Moist	TMF	TRS				15.4					90.2358162550086		0.52492087788403	-1.76	-1.97		13.0533333333333					7.053505875125	0.001080296125	-1.45	-2.82	-4.65111111111111	-3.68444444444444	26.90113321	0.812098755718905	0.540153846153846	-2.50714251037317	-2.94416607015032	0.135103549449461	16.8902654031655	0.362309664335693	0.649250749250749	3.034447826088	0.864896450550539
Cordia	americana	Boraginaceae	Angiosperm	T	E	E		Tropical Dry	STF	TRR									56.8181818181818			-1.36	-1.58							0.65	0.0063	-0.43	-1.37				1.0100000101	0.73						0.525974025974026
Cordia	bicolor	Boraginaceae				D			TMF										101.511575634974		0.465709643086173
Cordia	collococca	Boraginaceae	Angiosperm	T	D	D		Tropical Dry	TDF	TRS									132.178813678509			-1.8	-2.09		9.01					3.71533023	0.000404829	-0.65	-2.34	-4.05	-3.4	22.22222222	0.896507207917952								2.079999999792
Cordia	cymosa	Boraginaceae	Angiosperm	T	E	E		Tropical Moist	TWF	TRR									73.0373306439683			-1.34	-1.5		11.13					7.806902666	0.000807631		-1.2	-2.55	-2.55	28.14814815	1.03741650093938								1.3511111112
Cordia	dentata	Boraginaceae	Angiosperm	S	E	D		Tropical Moist	TDF	TRS									87.9171890412982			-1.88	-2.14		11.86					1.504974247	0.000251484	-1	-3.6	-6.25	-5.25	14.33962264	0.563510444666092	0.5						0.675324675324675	2.06490566016
Cordia	elaeagnoides	Boraginaceae	Angiosperm	T					TDF	TRS									53.99999999568											1.59			-1.15					0.54						0.649350649350649
Cordia	lasiocalyx	Boraginaceae	Angiosperm	T	E	E		Tropical Moist	TMF	TRR									56.0168719546942		0.56322407918788	-1.48	-1.63		11.96					3.764341188	0.000191891	-0.9	-2.57	-4.27	-3.37	22.35294118	1.49240589261543	0.397						0.742207792207792	2.297882353304
Cordia	lucidula	Boraginaceae	Angiosperm	T	E	E		Tropical Moist	TWF	TRR									56.0991149334079			-1.29	-1.4		10.46					3.323462731	0.000288741	-0.23	-1.58	-2.97	-2.74	27.3381295	1.83290504452126								1.7277697844
Cordia	panamensis	Boraginaceae	Angiosperm	T	E	E		Tropical Moist	TMF	TRR									90.6605603950631			-1.79	-2		12.46					11.63171081	0.000731387	-1.07	-2.33	-3.61	-2.54	29.6875	1.47108797253185								2.766875
Cordia	sagotii	Boraginaceae		W		E		Tropical Moist	TMF													-1.53625	-1.90916
Cordia	trichotoma	Boraginaceae	Angiosperm	T	E				STF	TRR																												0.6094						0.604285714285714
Cornus	macrophylla	Cornaceae		W		D		Tropical Dry	STF													-1.675	-1.89	0.114					0.886
Corymbia	intermedia	Myrtaceae	Angiosperm	T	E				TMF	TRR				9.313					114.562161694049	-27.001										6.335	0.000879608						1.01506795876233	0.625						0.594155844155844
Corymbia	polycarpa	Myrtaceae	Angiosperm	T	E				TS	TRS				26.93					155.956738048149	-26.606										8.37	0.000974407						0.942631449955696	0.576						0.625974025974026
Cosmibuena	valerioi	Rubiaceae	Angiosperm	T	E				TWF	TRR																				0.39	0.00041						0.0961538461538462
Cotylelobium	burckii	Dipterocarpaceae	Angiosperm	T	E				TWF	TROP HEATH FOREST																						-0.25	-0.45	-0.65	-0.4	190		0.815						0.470779220779221	3.42
Couepia	bracteosa	Chrysobalanaceae		W		E		Tropical Moist	TMF													-2.055	-2.25548
Couepia	caryophylloides	Chrysobalanaceae		W		E		Tropical Moist	TMF													-1.9525	-1.86756
Couepia	polyandra	Chrysobalanaceae		W		E		Tropical Dry	TDF													-2.21	-2.98
Couratari	oblongifolia	Lecythidaceae		W		E		Tropical Moist	TMF													-1.47916666706731	-1.861666667
Coursetia	ferruginea	Fabaceae		W		D		Tropical Dry	TDF										37.1			-1.97	-2.46		7.34	0.17
Coussarea	curvigemmia	Rubiaceae				E			TMF
Coutarea	hexandra	Rubiaceae				E			TMF										65.4079568442347		0.698949231438834
Croixia	luzoniensis	Sapotaceae							TWF
Crossopteryx	febrifuga	Rubiaceae		W		D		Tropical Dry	TS													-1.44	-1.73	0.13	11.48				0.87
Croton	billbergianus	Euphorbiaceae				E			TMF										56.9790964261632		0.473117178022001
Croton	macrostachyus	Euphorbiaceae		Tree			Trs					-1.8
Croton	yanhuii	Euphorbiaceae	Angiosperm	T	D	D		Tropical Dry	TMF	TRR												-1.395	-1.805							5.16	0.00058975	-0.36	-1.48	-2.6	-2.23	34.05747617	0.900414190527643	0.61						0.603896103896104	2.016202589264
Cryptocarya	chinensis	Lauraceae	Angiosperm	T	E	E		Tropical Dry	TMF	TRS	Tropical		0.137566667	7.786666667					91.5388090113308	-32.17			-1.52							1.232297458	0.000162788	-1.47	-3.78	-6.75	-5.28	12.79461279	0.753568145167367	0.524809282						0.659214751948052	1.934545453848
Cryptocarya	concinna	Lauraceae	Angiosperm	T	E			Tropical Dry	TMF	TRS			0.0780875	5.995625					95.2378312932485	-28.286			-1.77							1.337232328	0.000152398	-1	-1.74	-4.44	-3.44	14.07407407	0.870996681502644	0.510618433						0.668429588961039	0.979555555272
Cryptocarya	laevigata	Lauraceae							TWF																												0.577796671328136
Cryptocarya	mackinnoniana NA	Lauraceae							TMF																												3.869666232
Cunninghamia	selaginoides	Cupressaceae	Gymnosperm	T	E					TRR																						-3.69	-5.1	-7.02	-3.33	19.79166667		0.346						0.775324675324675	4.03750000068
Cupania	cinerea	Sapindaceae				E			TMF										72.4881995954147		0.612937950904201
Cupania	diphylla	Sapindaceae		W		E		Tropical Moist	TMF													-2.1925	-2.45516
Cupania	latifolia	Sapindaceae				E			TMF										94.8153143028396		0.510600466118762
Cupania	rufescens	Sapindaceae				E			TMF										101.146325016858		0.514483316809301
Cupania	scrobiculata	Sapindaceae		W		E		Tropical Moist	TMF													-1.8075	-2.13484
Cupania	seemannii	Sapindaceae				E			TMF										43.8300741739717		0.568449292302118
Cupressus	torulosa	Cupressaceae		W		E		Tropical Dry	STF													-0.63	-1.02	0.1225					0.8775
Curatella	americana	Dilleniaceae	Angiosperm	T	E	E		Tropical Dry	TDF	TRS			0.168										-1.91							1.25	0.000127						0.925925925925926	0.65						0.577922077922078
Cussonia	djalonensis	Araliaceae		W		D		Tropical Dry	TS													-1	-1.37	0.103	3.83				0.897
Cyclobalanopsis	semiserrata	Fagaceae	Angiosperm	W		E		Tropical Moist	TMF										57			-1.18	-1.42		34.05	0.748
Cynophalla	flexuosa	Capparaceae		W		E		Tropical Dry	TDF										89.1			-2.28	-3.79
Cynophalla	verrucosa	Capparaceae		W		E		Tropical Dry	TDF										112.4			-2.97	-3.65		14.4	0.226
Cyrillopsis	paraensis	Ixonanthaceae		W		E		Tropical Moist	TMF													-1.95416666706731	-2.06828
Dacrycarpus	dacrydioides	Podocarpaceae	Gymnosperm	T	E					TRR																				0.28	0.0001073	-1.81674696	-2.32309999983333	-2.9403863735	-1.12363941325	65.0185504625		0.441183455						0.713517237012987	6.04178378274389
Dacryodes	cuspidata	Burseraceae		W		E		Tropical Moist	TMF													-1.59416666706731	-1.719533333
Dacryodes	rugosa	Burseraceae							TWF
Dahlstedtia	muehlbergiana	Fabaceae	Angiosperm	T	E				STF	TRR																												0.7628						0.504675324675325
Dalbergia	miscolobium	Fabaceae	Angiosperm	T	D				TS	TRS				9.8																								0.612						0.602597402597403
Davilla	nitida	Dilleniaceae				E			TMF										71.3643515396718		0.638377900167335
Decaspermum	gracilentum	Myrtaceae		S		E					Tropical
Dendrobium	crumenatum	Orchidaceae		H				Tropical Moist														-0.55	-0.64	0.1215	16.2	0.19			0.8785
Dendropanax	arboreus	Araliaceae				E			TMF										96.0890087660148		0.638160348307893
Dendropanax	latilobus	Araliaceae	Angiosperm	T	E				TWF	TRR																				0.64	0.00062						0.147058823529412
Desmopsis	panamensis	Annonaceae				E			TMF
Dialium		Fabaceae							TWF
Dialium	indum	Fabaceae							TWF
Dialium	platycephalum	Fabaceae							TWF
Dicorynia	guianensis	Fabaceae		W		E		Tropical Moist	TMF													-1.45325	-1.7119066666
Didymopanax	vinosum	Araliaceae		W		E		Tropical Dry	TS										148			-1.95	-2.35	0.16	14.81				0.84
Dillenia	excelsa	Dilleniaceae							TWF
Dimorphocalyx	muricatus	Euphorbiaceae		W		E		Tropical Dry	TMF													-1.285	-1.565	0.11					0.89
Dioclea	wilsonii	Fabaceae				E			TMF
Diospyros		Ebenaceae		W				Tropical Dry	TS													-2.11	-2.45	0.0859999999999999	14.65				0.914
Diospyros	artanthifolia	Ebenaceae				E			TMF										138.907619689818		0.505205610743755
Diospyros	brachiata	Ebenaceae	Angiosperm	T	E				TWF	TRR																							-0.42	-0.93	-0.93	74.50980392		0.54						0.649350649350649	1.251764705856
Diospyros	carbonaria	Ebenaceae		W		E		Tropical Moist	TMF													-1.62666666646634	-1.7056666665
Diospyros	hermaphroditica	Ebenaceae	Angiosperm	T	E				TWF	TROP HEATH FOREST																						-0.13	-0.6	-1.07	-0.94	80.85106383		0.595						0.613636363636364	1.94042553192
Diospyros	kaki	Ebenaceae		Tree			Trs					-1.7
Diospyros	mindanaensis	Ebenaceae	Angiosperm	T	E				TWF	TRR																						-0.43	-0.79	-1.15	-0.72	105.5555556		0.65						0.577922077922078	3.33555555696
Diospyros	morrisiana	Ebenaceae	Angiosperm	T	E			Tropical Dry	TMF	TRS			0.167444444	7.853333333					73.8966163857413	-31.247			-1.79							2.960551717	0.000555561	-0.59	-0.89	-1.22	-0.63	115.1515152	0.574659801397573	0.478595938						0.689223416883117	4.09939394112
Diospyros	nigrocortex	Ebenaceae		W		E		Tropical Dry	TMF													-1.2584125435	-2.030233333
Diplospora	dubia	Rubiaceae	Angiosperm	S	E			Tropical Dry	TMF	TRS			0.09282	5.78					90.6168105878646	-29.741			-1.93							0.849592054	0.000138863	-0.22	-2.21	-4.75	-4.53	14.96062992	0.640816143440286	0.630198532						0.590780174025974	1.322519684928
Dipterocarpus	crinitus	Dipterocarpaceae							TWF
Dipterocarpus	globosus	Dipterocarpaceae	Angiosperm	T	E				TWF	TRR																						-0.01	-0.18	-0.35	-0.34	223.5294118		0.7						0.545454545454545	1.60941176496
Dipteryx	oleifera	Fabaceae				D			TMF										79.2125571289428		0.595426269784727
Dodonaea	physocarpa	Sapindaceae	Angiosperm	S	E				TS	TRS				23.45					136.177264444252	-26.089										1.07	0.000263963						0.350901817671416	0.799						0.481168831168831
Doliocarpus	dentatus	Dilleniaceae				E			TMF
Doliocarpus	major	Dilleniaceae				E			TMF										79.9055967633176		0.605736617284354
Doliocarpus	multiflorus	Dilleniaceae				E			TMF
Doliocarpus	olivaceus	Dilleniaceae				E			TMF										53.6075522589346		0.613941921934854
Doryphora	aromatica	Atherospermataceae							TMF																												3.536107011
Drimys	granadensis	Winteraceae	Angiosperm	T	E				TWF	TRR																				0.39	0.00033	-0.85	-1.64	-2.39	-1.54	50.66666667	0.119047619047619	0.454669						0.70476038961039	3.323733333552
Drimys	granadensis var. mexicana	Winteraceae	Angiosperm	T	E					TRR																						-1.39	-2.3	-2.93	-1.54	60.31746032		0.415						0.730519480519481	5.54920634944
Drimys	insipida	Winteraceae	Angiosperm	T	E					TRR																						-4.08	-4.68	-6	-1.92	28.78787879		0.554086						0.640203896103896	5.389090909488
Dryobalanops		Dipterocarpaceae							TWF
Dryobalanops	aromatica	Dipterocarpaceae	Angiosperm	T	E				TWF	TRR																						-0.07	-0.26	-0.45	-0.38	200		0.68						0.558441558441558	2.08
Drypetes		Putranjivaceae							TWF
Drypetes	indica	Putranjivaceae	Angiosperm	S	E	E		Tropical Dry	TDF	TRS			0.09	4.29
Drypetes	standleyi	Putranjivaceae				D			TMF										98.2992432756425		0.631190253234557
Drypetes	variabilis	Putranjivaceae		W		E		Tropical Moist	TMF													-1.79208333353366	-2.1220133335
Duguetia	furfuracea	Annonaceae		W		E		Tropical Dry	TS										167			-2.89	-3.33	0.032	44.72				0.968
Dussia	munda	Fabaceae	Angiosperm	T	E				TWF	TRR				12.3																	0.0006732							0.53						0.655844155844156
Dysoxylum	grandifolium	Meliaceae	Angiosperm	T	E				TMF	TRS																												0.5						0.675324675324675
Dysoxylum	papuanum	Meliaceae	Angiosperm			E		Tropical Moist															-2.12
Elaeocarpus		Elaeocarpaceae							TWF
Elaeocarpus	angustifolius	Elaeocarpaceae							TWF																		0.42525	2295.525									0.384057294869633	0.485						0.685064935064935
Elaeocarpus	austroyunnanensis	Elaeocarpaceae	Angiosperm	T	E				TMF	TRS																												0.73						0.525974025974026
Elaeocarpus	grandis	Elaeocarpaceae	Angiosperm			E		Tropical Moist															-2.16
Elaeocarpus	sylvestris	Elaeocarpaceae		T		E					Tropical
Elaphoglossum	glaucum	Dryopteridaceae		F		E		Tropical Moist														-1.34	-1.41	0.0440000000000001	49.9				0.956
Elaphoglossum	lancifolium	Dryopteridaceae		F		E		Tropical Moist														-1.51	-1.58	0.0509999999999999	48				0.949
Endiandra	microneura	Lauraceae							TWF																		0.41325	3034.3									0.494627897839916	0.6775						0.560064935064935
Endospermum	chinense	Euphorbiaceae		T							Tropical
Enterolobium	cyclocarpum	Fabaceae	Angiosperm	T	D	D	Trs	Tropical Dry	TDF	TRS		-1.859431317					-2.501201684					-1.512655003	-1.82							3.5	0.000426	-2	-2.73	-3.5	-1.5	49.35064935	0.78740157480315	0.39						0.746753246753247	5.38909090902
Enterolobium	schomburgkii	Fabaceae							TMF
Eperua	falcata	Fabaceae							TMF
Eperua	grandiflora	Fabaceae		W		E		Tropical Moist	TMF													-1.52244791646635	-2.06507333325
Eperua	leucantha	Fabaceae		W		E		Tropical Moist	TWF										104.71285480509			-1.19	-1.36			0.24
Eperua	purpurea	Fabaceae							TWF																												0.58
Epiprinus	siletianus	Euphorbiaceae	Angiosperm	T	E				TMF	TRS																												0.68						0.558441558441558
Eriotheca	gracilipes	Malvaceae		W		D		Tropical Dry	TS													-2.1	-2.75	0.106	17.73				0.894
Eriotheca	pubescens	Malvaceae	Angiosperm	T	D				TS	TRS			0.466666666666667						142.649624830722											3.73666666666667	0.000953666666666667							0.545666666666667						0.645670995670996
Erythrina	costaricensis	Fabaceae							TMF
Erythrophleum	chlorostachys	Fabaceae	Angiosperm	T	D				TS	TRS				17.04					160.269880092251	-25.131										2.35	0.000361684							0.717						0.534415584415584
Erythroxylon	cumanensis	Erythroxylaceae		W		D		Tropical Dry	TDF													-2.11	-3.02
Erythroxylon	densum	Erythroxylaceae		W		D		Tropical Dry	TDF										75.9			-2.07	-2.94
Erythroxylon	orinocense	Erythroxylaceae		W		D		Tropical Dry	TDF													-1.08	-1.64
Erythroxylum		Erythroxylaceae		W				Tropical Dry	TS													-2.35	-2.85	0.116	21.93				0.884
Erythroxylum	daphnites	Erythroxylaceae	Angiosperm	T	E				TDF	TRS									65.7894736842105											0.6534	0.000198						0.321543408360129
Erythroxylum	macrophyllum	Erythroxylaceae				E			TMF										111.036187907395		0.530142720408464
Erythroxylum	ovalifolium	Erythroxylaceae		W		E		Tropical Dry	STF													-1.77	-2.31		8.98
Erythroxylum	panamense	Erythroxylaceae				E			TMF
Erythroxylum	suberosum	Erythroxylaceae	Angiosperm	T	D	D		Tropical Dry	TS	TRS			0.2365						255.754475703325	-27.25		-2.12	-2.6	0.124	20.07				0.876	0.41	0.000578						0.0665046398585948	0.633						0.588961038961039
Eschweilera	coriacea	Lecythidaceae		W		E		Tropical Moist	TMF													-1.45261904773352	-1.82828761914286
Eschweilera	grandiflora	Lecythidaceae		W		E		Tropical Moist	TMF													-1.35	-1.7542
Eschweilera	pedicellata	Lecythidaceae							TMF										77.2069252325		0.690113163063816	-1.1724677535	-1.52053972575		23.9683614325
Esenbeckia	nesiotica	Rutaceae	Angiosperm	T					TDF	TRS									99.0000000099											0.43			-4.74					1.06						0.311688311688312
Eucalyptus		Myrtaceae	Angiosperm	T	E				STF	TRS																				4.29675	0.001274	-0.6	-1.6925	-2.7	-2.1	40.430107525	0.309057734390652								2.7371182794425
Eucalyptus	amygdalina var. regnans	Myrtaceae	Angiosperm	T	E					TRR																					0.00021		-2.7					0.523333333333333						0.66017316017316
Eucalyptus	grandis	Myrtaceae	Angiosperm	T	E				STF	TRS																				3.547	0.001363		-1.31				0.241433337385361	0.662						0.57012987012987
Eucalyptus	miniata	Myrtaceae	Angiosperm	T	E					TRS																				3.13	0.00064						0.340136054421769	0.897666666666667						0.417099567099567
Eucalyptus	platyphylla	Myrtaceae	Angiosperm	T	D				TMF	TRR				16.82					103.382000000441	-27.731										2.62	0.000261986						0.577553943538327	0.49						0.681818181818182
Eucalyptus	tetrodonta	Myrtaceae	Angiosperm	T	E					TRS																				2.5	0.00059	-3.02	-6.27				0.591715976331361	0.922						0.401298701298701
Eugenia		Myrtaceae							TWF
Eugenia	casearioides	Myrtaceae		W		E		Tropical Dry	TDF													-2.87	-4
Eugenia	coloradoensis	Myrtaceae				E			TMF										73.9492020678804		0.54837985243415
Eugenia	cuprea	Myrtaceae							TWF
Eugenia	galalonensis	Myrtaceae				E			TMF										80.8046752079119		0.602512100496715
Eugenia	nesiotica	Myrtaceae				E			TMF
Eugenia	oerstediana	Myrtaceae				E			TMF										64.7336480107889		0.582195958052456
Eugenia	umbelliflora	Myrtaceae		W		E		Tropical Dry	STF													-1.66	-2.01		10.65
Eupomatia	laurina	Eupomatiaceae	Angiosperm	S	E				TWF	TRR			0.1																	1.12397	9.8e-05						1.28331155981387	0.544						0.646753246753247
Eurya	pittosporifolia	Pentaphylacaceae		W		E		Tropical Dry	TMF													-0.916767528	-1.455668
Falcatifolium	taxoides	Podocarpaceae	Gymnosperm	T	E					TRR																				0.3	7.6e-05						0.37037037037037
Faramea	occidentalis	Rubiaceae				E			TMF
Ficus		Moraceae		W		E		Tropical Moist	TMF													-0.940833332932692	-1.413773333
Ficus	altissima	Moraceae	Angiosperm	T	E				TMF	TRS			0.287983333						147.679150801359											2.575423343	0.000352085						1.63811701725101	0.535488699						0.652280065584416
Ficus	auriculata	Moraceae	Angiosperm	T	E	E	Tr	Tropical Dry	TMF	TRS		-0.527959261	0.462416667	12.87			-2.776264089		67.3768901489972			-0.697299134	-0.86							6.421055747	0.000585442						1.21457981611262	0.538401777						0.650388456493507
Ficus	benjamina	Moraceae	Angiosperm	T	E	E	Tr	Tropical Dry	TMF	TRS		-1.353180676	0.255041667	12.84			-2.879767587		99.1493900457427			-1.368269067	-1.65							1.503144126	0.000129024						1.73610809703455	0.546204377						0.645321833116883
Ficus	callosa	Moraceae	Angiosperm	T	E				TMF	TRS			0.344183333						74.0082691008042											6.95329066	0.000828043						1.10508837944315	0.407841982						0.735167544155844
Ficus	citrifolia	Moraceae	Angiosperm	T	E	D			TMF	TRR																					0.000162	-1.1	-1.6	-2.2	-1.1	63.33333333		0.4						0.74025974025974	4.05333333312
Ficus	concinna	Moraceae	Angiosperm	T	E	E	Tr	Tropical Dry	TMF	TRS		-2.038211665	0.263283333	15.36			-2.720851721		87.3300000269937			-1.937319518	-2.32							1.6403757	0.000111201						1.48678987198739	0.550680641						0.642415168181818
Ficus	costaricana	Moraceae				D			TMF										102.899527983817		0.563062348624215
Ficus	curtipes	Moraceae	Angiosperm	T	E	E	Tr	Tropical Dry	TMF	TRS		-1.047136658	0.331520833	16.56			-1.67297937		154.69731283633			-1.215389842	-1.47							1.251503194	0.000160833						0.735434715460309	0.522024235						0.661023224025974
Ficus	esquiroliana	Moraceae	Angiosperm	T	E	E	Tr	Tropical Dry	TMF	TRS		-0.601859299	0.432791667	12.61			-1.952542546		48.7099999915878			-0.943604552	-1.15							3.719531213	0.000687913						2.0658596041813	0.486490933						0.684096796753247
Ficus	fistulosa	Moraceae	Angiosperm	T	E				TMF	TRS			0.407222222						69.0874587501669											6.125911973	0.000600966						1.11045347588595	0.533612962						0.653498076623377
Ficus	fulva	Moraceae	Angiosperm	T	E				TMF	TRS																												0.48						0.688311688311688
Ficus	hispida	Moraceae	Angiosperm	T	E	E	Tr	Tropical Dry	TMF	TRS		-1.031959793	0.3663	13.05			-3.167739562		93.5951220970316			-1.011550875	-1.23							4.074221335	0.000577615						0.862410956068786	0.411364312						0.732880316883117
Ficus	insipida	Moraceae	Angiosperm	T	E	E		Tropical Moist	TMF	TRS				19.2					75.7575757575758			-1.69802898	-2.038259321							11.799163	0.0022158	-0.5	-1.78				0.5	0.315	-1.40202623701214	-1.6250127824931	0.113720879147579	10.2172557165788	0.435582284353584	0.795454545454545		0.886279120852421
Ficus	matiziana	Moraceae				D			TMF
Ficus	maxima	Moraceae				D			TMF										78.9690567168652		0.682812640578628
Ficus	obtusifolia	Moraceae				D			TMF										111.33588072226		0.572762334289478
Ficus	orthoneura	Moraceae		W		E		Tropical Dry	TDF													-1.285	-1.41
Ficus	pisocarpa	Moraceae	Angiosperm	W	D	D		Tropical Dry	TDF	TRR												-1.18	-1.375							7.98	0.00123804	-0.25	-0.81	-1.37	-1.12	68.11495234	0.672992798977051	0.53						0.655844155844156	2.206924455816
Ficus	popenoei	Moraceae				D			TMF										68.5547314003147		0.441237466024798
Ficus	racemosa	Moraceae	Angiosperm	T	E	E	Tr	Tropical Dry	TMF	TRS		-1.297974172	0.47717375	19.02			-3.349464887		50.2039150238915			-1.189909971	-1.44							12.69076004	0.002419125						0.5968011458582	0.36616197						0.762232487012987
Ficus	religiosa	Moraceae	Angiosperm	T	E	E	Tr	Tropical Dry	TMF	TRS		-1.534856932	0.441683333	15.46			-2.295611223		85.1661612885364			-1.402242229	-1.69							2.362987908	0.000356274						0.766524348645935	0.372446697						0.758151495454545
Ficus	semicordata	Moraceae	Angiosperm	T	E	E	Tr	Tropical Dry	TMF	TRS		-0.986912272	0.36825	15.65			-2.04724809		80.5645423668896			-1.257856294	-1.52							9.443862701	0.000985054						1.10926603194464	0.437292355						0.716043925324675
Ficus	tinctoria	Moraceae	Angiosperm	T	E	E	Tr	Tropical Dry	TMF	TRS		-1.547423699	0.281146667	13.02			-2.325481542		83.1121991982924			-1.512655003	-1.82							2.506015418	0.00016487						1.65698435475372	0.442700107						0.712532398051948
Ficus	tonduzii	Moraceae				D			TMF										123.623286131715		0.791953474157878
Ficus	trigonata	Moraceae				D			TMF										99.5729377388177		0.610100594399058
Ficus	virens	Moraceae	Angiosperm	T	E				TMF	TRS			0.247333333						91.8849716224383											2.126044587	0.000323667						0.990501094503709	0.557564977						0.63794482012987
Ficus	yoponensis	Moraceae				D			TMF										96.2463474938188		0.639006011378831
Flindersia	brayleyana NA	Rutaceae							TMF																												3.832682665
Forchhammeria	pallida	Resedaceae		W		D		Tropical Dry	TDF													-2.51	-2.845
Forsteronia	acouci	Apocynaceae				E			TMF
Forsteronia	myriantha	Apocynaceae				E			TMF
Frenela	rhomboidea	Cupressaceae	Gymnosperm	T	E					TRR																				0.33	7.69678e-05	-6.51745355175	-8.9691666675	-11.5833797825	-5.065822045	15.96074579125		0.527045109						0.657762916233766	5.72618356557282
Fridericia	candicans	Bignoniaceae				E			TMF										61.6992582602832		0.582459618497703
Fridericia	florida	Bignoniaceae				E			TMF										62.2611822881546		0.645320850328124
Fridericia	patellifera	Bignoniaceae				E			TMF
Fridericia	schumanniana	Bignoniaceae				E			TMF										58.2153292874803		0.565791037156532
Friesodielsia	enghiana	Annonaceae							TWF
Gallesia	integrifolia	Phytolaccaceae	Angiosperm	T	E				TDF	TRS									45.4545454545455											2.502	0.000252						0.884955752212389	0.51						0.668831168831169
Garcinia	cowa	Clusiaceae	Angiosperm	T	E				TMF	TRS																												0.55						0.642857142857143
Garcinia	intermedia	Clusiaceae				E			TMF										130.478759271746		0.445567161921376
Garcinia	madruno	Clusiaceae				E			TMF										119.521240728254		0.456455483302265
Garcinia	xanthochymus	Clusiaceae	Angiosperm	T	E				TMF	TRS																												0.79						0.487012987012987
Gardenia	vilhelmii	Rubiaceae	Angiosperm	T	D				TS	TRS				13.86					99.6878124627255	-27.533										2.71	0.000622646						0.467510367042389	0.643						0.582467532467532
Garuga	floribunda	Burseraceae	Angiosperm	T	D				TMF	TRS																												0.69						0.551948051948052
Genipa	americana	Rubiaceae	Angiosperm			D		Tropical Dry	TMF										84.243650258485		0.670321266677985		-2.55
Gillbeea	adenopetala NA	Cunoniaceae							TMF																												3.8569852
Gironniera	subaequalis	Cannabaceae	Angiosperm	T	E			Tropical Dry	TMF	TRS			0.1555	8.023333333					69.098979967353	-30.796			-1.07							4.117663148	0.000476207	-0.31	-2.98	-3.65	-3.34	56.71641791	0.863244764420504	0.519107986						0.662916892207792	6.760597014872
Girroniera	nervosa	Cannabaceae							TWF
Gliricidia	sepium	Fabaceae	Angiosperm	T	D	D	Trs	Tropical Dry	TDF	TRS		-1.667107407					-2.418017445		35.99999999712			-1.325802616	-1.6	0.07					0.93	9.235	0.000275		-0.85				1.49253731343284	0.62875						0.591720779220779
Gmelina	arborea	Lamiaceae	Angiosperm	T	D				TMF	TRS																												0.55						0.642857142857143
Gnetum	costatum	Gnetaceae	Gymnosperm	T	E				TWF	TRR			0.225	13.23																1.12	0.000125		-3.1				0.833333333333333
Gnetum	gnemon	Gnetaceae	Gymnosperm	T	E				TWF	TRR			0.23	13.45																1.1	0.000127		-4.620333333				0.833333333333333	0.61						0.603896103896104
Gossia	bidwillii	Myrtaceae	Angiosperm	T	E				TDF	TRS			0.116	4.17					86.1326442721792											1.24	0.00018		-5.12	-12	-12	5.523255814	0.636942675159236	0.71						0.538961038961039	1.1311627907072
Gouania	lupuloides	Rhamnaceae				E			TMF
Graffenrieda	emarginata	Melastomataceae							TWF
Grevillea	parallela	Proteaceae	Angiosperm	T	E				TS	TRS				17.776					214.713986381387	-26.8825										4.705	0.000742665						0.541258488798941	0.651						0.577272727272727
Grevillea	striata	Proteaceae	Angiosperm	T	E				TS	TRS				22.67					386.711043450119	-28.21										2.31	0.000877705						0.367648410472097	0.661						0.570779220779221
Guapira		Nyctaginaceae	Angiosperm	T	D					TRS																				1.7								0.475						0.691558441558442
Guapira	areolata	Nyctaginaceae	Angiosperm	T	D				TS	TRS			79.67						98.7849451743554											8.1							0.436033836225691	0.46						0.701298701298701
Guapira	noxia	Nyctaginaceae	Angiosperm	T	D				TS	TRS			35.4						126.879399927436											3.68666666666667	0.00105166666666667						0.120187685089035	0.497						0.677272727272727
Guapira	standleyana	Nyctaginaceae				E			TMF										71.2519667340975		0.704541338686778
Guarea		Meliaceae							TWF
Guarea	bullata	Meliaceae							TMF										115.306810519218		0.701472335652487
Guarea	grandifolia	Meliaceae				E			TMF										61.5306810519218		0.533955452219637
Guarea	guidonia	Meliaceae	Angiosperm	T	D	E			TS	TRS									99.8402555910543		0.743410002872555									7.7	0.0029							0.467						0.696753246753247
Guatteria	dumetorum	Annonaceae	Angiosperm	T	D	E			TWF	TRR				12.2					92.6500337154417		0.571228428710223										0.0006912							0.42						0.727272727272727
Guazuma	ulmifolia	Malvaceae				E			TMF										61.9614894732899		0.689885345060525
Guettarda	foliacea	Rubiaceae				E			TMF
Guibourtia	hymenaeifolia	Fabaceae	Angiosperm	T	E				TDF	TRS									75.7575757575758											2.772	0.000738	-2.4	-5.7	-8.63	-6.23	12.96928328	0.371747211895911								2.95699658784
Gustavia	hexapetala	Lecythidaceae		W		E		Tropical Moist	TMF													-1.62305555548878	-1.98346222216667
Gustavia	superba	Lecythidaceae				E			TMF										71.7296021577883
Haematoxylon	brasiletto		Angiosperm	T					TDF	TRS									63.00000001197																			0.81						0.474025974025974
Hamelia	axillaris	Rubiaceae				E			TMF
Hampea	appendiculata	Malvaceae				E			TMF										113.283884018881		0.928745914638975
Hancea	penangensis	Euphorbiaceae	Angiosperm	W		E		Tropical Moist	TWF										47			-1.02	-1.15		27.57	0.566
Harpullia	ramiflora	Sapindaceae	Angiosperm	T	E				TMF	TRS																												0.81						0.474025974025974
Hasseltia	floribunda	Salicaceae				E			TMF										64.7336480107889		0.62747587990331
Heisteria	acuminata	Olacaceae				E			TMF
Heisteria	concinna	Olacaceae				E			TMF										127.669139132389		0.583500199715472
Heliocarpus	pallidus	Malvaceae	Angiosperm	T	D				TDF	TRS									50											7.585			-0.66					0.51						0.668831168831169
Heritiera	sumatrana	Malvaceae	Angiosperm	T	E				TWF	TRR																						-0.82	-1.69	-2.56	-1.74	43.67816092		0.53						0.655844155844156	2.952643678192
Herrania	purpurea	Malvaceae				E			TMF
Heteropteris	laurifolia	Pteridaceae				E			TMF
Heteropterys		Malpighiaceae		W		E		Tropical Moist	TWF													-1.35	-1.97	0.2184		0.16			0.7816
Hevea	brasiliensis	Euphorbiaceae	Angiosperm	S	D	D		Tropical Dry	TDF	TRS			0.375	14.18				-2.2375												3.6	7.2e-05	-0.899152512	-1.32	-1.740847488	-0.8416949755	90.353093975									4.77064336188
Hibiscus		Malvaceae	Angiosperm	T	E				TWF	TRR			0.78	27.9																9.2	0.00041						1.33333333333333
Hieronyma	alchorneoides	Phyllanthaceae				E			TMF										96.0515471641567		0.783870174638778
Hippocratea	volubilis	Celastraceae				E			TMF
Hiraea	faginea	Malpighiaceae				E			TMF
Hiraea	grandifolia	Malpighiaceae				E			TMF
Hiraea	reclinata	Malpighiaceae				E			TMF
Hiraea	smilacina	Malpighiaceae				E			TMF										39.7842211732974		0.435215857005182
Hirtella	americana	Chrysobalanaceae				E			TMF										128.287255563048		0.441210818403546
Hirtella	glandulosa	Chrysobalanaceae		W		E		Tropical Moist	TMF													-1.48625	-1.88628
Hirtella	suffulta	Chrysobalanaceae		W		E		Tropical Moist	TMF													-1.50875	-1.675853333
Hirtella	triandra	Chrysobalanaceae				E			TMF										97.4376264329063		0.536085711750388
Holocalyx	balansae	Fabaceae	Angiosperm	T	E				STF	TRR																												0.859						0.442207792207792
Homalanthus	novoguineensis	Euphorbiaceae	Angiosperm	T	E				TWF	TRR			0.72	26																3.87	0.00032						0.909090909090909
Homalium		Salicaceae	Angiosperm	T					TWF	TROP HEATH FOREST																						-2.32	-6.3	-10.28	-7.96	9.547738693									2.406030150636
Hopea		Dipterocarpaceae							TWF
Horsfieldia		Myristicaceae	Angiosperm	T	E				TWF	TRR			0.185																	1.45455	0.000188						0.740740740740741
Horsfieldia	grandis	Myristicaceae							TWF
Horsfieldia	kingii	Myristicaceae	Angiosperm	T	E				TMF	TRS																												0.54						0.649350649350649
Humiriastrum	diguense	Humiriaceae	Angiosperm	T	E				TWF	TRR				11.2																	0.0006138							0.58						0.623376623376623
Hura	crepitans	Euphorbiaceae				D			TMF										85.6372218476062		0.79560435777094																0.717690849226037
Hybanthus	prunifolius	Violaceae	Angiosperm	W		E		Tropical Moist	TMF										32.46753247			-1.218507321	-1.74
Hylenaea	praecelsa	Celastraceae				E			TMF
Hymenaea	courbaril	Fabaceae	Angiosperm	T	E	D	Trs	Tropical Dry	TDF	TRS		-2.472043543					-3.108405545		78.125			-1.88374481003365	-1.808449889							4.35	0.0005255	-2.1	-3	-3.9	-1.8	42.22222222	0.812117305833065	0.79235						0.485487012987013	5.0666666664
Hymenaea	martiana	Fabaceae	Angiosperm	T	E	E		Tropical Dry	TS	TRS									103.599999994737			-2.03	-2.32							2.94	0.000412		-2.8				0.684931506849315	0.56						0.636363636363636
Hymenaea	stigonocarpa	Fabaceae	Angiosperm	T	E	E		Tropical Dry	TS	TRS									145.19999999152			-2.35	-2.64							3.59	0.000656		-3.17				0.555555555555556	0.72						0.532467532467533
Hymenosporum	flavum	Pittosporaceae		W		E		Tropical Moist	G													-1.38	-2.06		5.88	0.361
Hyparrhenia	diplandra	Poaceae		H				Tropical Dry	TS													-1.11	-1.55	0.118	6.47				0.882
IND	B15			W		E		Tropical Moist	TMF													-1.7275	-2.038466667
Inga	acuminata	Fabaceae							TMF										43.4929197572488		0.588487398105508
Inga	cocleensis	Fabaceae							TMF										76.1968981793661
Inga	goldmanii	Fabaceae				D			TMF										71.3081591368847		0.610997420348502
Inga	laurina	Fabaceae				E			TMF										100.359631377838		0.586467207057994
Inga	marginata	Fabaceae				E			TMF										80.3176743837567		0.513891819715058
Inga	mucuna	Fabaceae				D			TMF
Inga	nobilis	Fabaceae							TMF										78.0325166704128		0.566282966267587
Inga	oerstediana	Fabaceae				E			TMF										81.5913688469319
Inga	pezizifera	Fabaceae				E			TMF										67.8242301640818		0.531089571639192
Inga	punctata	Fabaceae							TMF										79.9055967633176		0.58996507957335
Inga	ruiziana	Fabaceae							TMF
Inga	sapindoides	Fabaceae							TMF										62.0364126770061
Inga	spectabilis	Fabaceae							TMF										86.6112234959167		0.613370256039135
Inga	thibaudiana	Fabaceae							TMF										96.5947403910991		0.427037586089285
Inga	umbellifera	Fabaceae							TMF
Ipomoea	wolcottiana	Convolvulaceae	Angiosperm	T	D					TRS																				2.2								0.605						0.607142857142857
Irvingia	malayana	Irvingiaceae	Angiosperm			E		Tropical Dry														-1.69	-1.84		38.38	0.476
Iryanthera	sagotiana	Myristicaceae		W		E		Tropical Moist	TMF													-1.44125	-1.83012
Isonandra	lanceolata	Sapotaceae	Angiosperm	T	E				TWF	TROP HEATH FOREST																						-0.09	-0.48	-0.87	-0.78	97.43589744		0.93						0.396103896103896	1.870769230848
Ixora	timorensis	Rubiaceae	Angiosperm	T	E				TMF	TRR				7.466					81.5300000026008	-27.007										2.4	0.000894052						0.898803692285568	0.52						0.662337662337662
Jacaranda	copaia	Bignoniaceae				D			TMF										109.058215329287		0.707364478302609
Juniperus	barbadensis var. lucayana	Cupressaceae	Gymnosperm	T	E	E		Temperate		TRR									234.741784037559											0.71		-2.15	-8.3					0.512						0.667532467532468			4.84		-2.15
Justicia	graciliflora	Acanthaceae				E			TMF
Kielmeyera	coriacea	Calophyllaceae	Angiosperm	T	D	D		Tropical Dry	TS	TRS			0.30425	11.5					135.50135501355	-26.148333335										0.93	0.0018405		-1.91				0.0186206896551724	0.538333333333333						0.6504329004329
Kleinhovia	hospita	Malvaceae	Angiosperm	T	E				TWF	TRR			0.76																	8.2	0.000445						1.66666666666667	0.428666666666667						0.721645021645021
Knema	globularia	Myristicaceae		W		E		Tropical Dry	TMF													-0.9667131155	-1.544148889
Lacistema	aggregatum	Lacistemataceae				E			TMF										57.2600584400989		0.631803058077604
Lacmellea	panamensis	Apocynaceae				E			TMF										92.0993481681277		0.541360794394314
Lacunaria	jenmanii	Ochnaceae		W		E		Tropical Moist	TMF													-1.76125	-2.09636
Laetia	procera	Salicaceae				E			TMF										96.3137783771634		0.607050726061264
Laetia	thamnia	Salicaceae				E			TMF
Lafoensia	punicifolia	Lythraceae				D			TMF										123.173746909418		0.611293797275948
Lagarostrobos	franklinii	Podocarpaceae	Gymnosperm	T	E					TRR																				0.27	0.00012	-2.3117058825	-3.687	-5.0672941175	-2.7555882355	27.64868217		0.582293461						0.621887362987013	4.0776276464316
Lagerstroemia	tomentosa	Lythraceae	Angiosperm	W	D	D		Tropical Dry	TDF	TRR												-1.725	-1.94							6.18	0.0006557		-1.29	-2.8		25.09498244	0.816926721673066	0.66						0.571428571428571	1.294901093904
Lantana	camara	Verbenaceae	Angiosperm	S	E	E		Tropical Dry	G	WDS								-0.8				-1.1	-1.37		4.85	0.227
Lasiococca	comberi	Euphorbiaceae	Angiosperm	W	E	E		Tropical Dry	TDF	TRR												-2.315	-2.73							2.65	0.0002541		-1.66	-3.43		21.42942321	1.02965403624382	0.67						0.564935064935065	1.422913701144
Lauraceae		Lauraceae		W		E		Tropical Moist	TMF													-2.1325	-2.40524
Leandra	dichotoma	Melastomataceae				E			TMF
Lecythidaceae		Lecythidaceae		W		E		Tropical Moist	TMF													-1.415	-1.80828
Lecythis	idatimon	Lecythidaceae							TMF
Lecythis	persistens	Lecythidaceae		W		E		Tropical Moist	TMF													-1.59392857142857	-1.94972
Lecythis	poiteaui	Lecythidaceae		W		E		Tropical Moist	TMF													-2.05533333317308	-2.5810693332
Licania		Chrysobalanaceae							TWF
Licania	alba	Chrysobalanaceae		W		E		Tropical Moist	TMF													-1.585	-2.04401333342857
Licania	canescens	Chrysobalanaceae		W		E		Tropical Moist	TMF													-1.655625	-2.047826666625
Licania	hypoleuca	Chrysobalanaceae				E			TMF										104.405484378512		0.432851328220275
Licania	membranacea	Chrysobalanaceae		W		E		Tropical Moist	TMF										113.694528319524		0.723791863903536	-1.98659722195513	-2.23912888866667		36.5105204694118
Licania	platypus	Chrysobalanaceae		W		E		Tropical Moist	TMF										68.02721088		0.578302585006732	-1.142937361	-1.41
Licaria	guianensis	Lauraceae		W		E		Tropical Moist	TMF													-2.16833333293269	-2.435053333
Ligustrum	confusum	Oleaceae		W		E		Tropical Moist	P													-2.14	-2.56	0.14	15.14				0.86
Lindackeria	laurina	Achariaceae				E			TMF										57.1476736345246		0.513254700672483
Liquidambar	obovata	Altingiaceae		T		E					Tropical
Lirianthe	henryi	Magnoliaceae	Angiosperm	T	E				TMF	TRS																												0.84						0.454545454545455
Lithocarpus	celebicus	Fagaceae							TWF
Litsea		Lauraceae							TWF
Litsea	formanii	Lauraceae							TWF
Litsea	noronhae	Lauraceae							TWF
Litsea	pierrei	Lauraceae	Angiosperm	T	E				TMF	TRS																												0.45						0.707792207792208
Lonchocarpus	heptaphyllus	Fabaceae				D			TMF										80.467520791189		0.498589425772509
Lonchocarpus	pubescens	Fabaceae		W		D		Tropical Dry	TDF										41.55172414			-1.84	-2.32		9.54	0.17
Lophopetalum	subobovatum	Celastraceae	Angiosperm	T	E				TWF	TRR																						-0.05	-0.59	-1.13	-1.08	70.37037037		0.54						0.649350649350649	1.660740740732
Lophostemon	suaveolens	Myrtaceae	Angiosperm	T	D				TMF	TRR				12.098					99.3213040584534	-27.384										4.055	0.000396053						0.767876725333515	0.55						0.642857142857143
Lozania	pittieri	Lacistemataceae				E			TMF
Luehea	seemannii	Malvaceae	Angiosperm	T		D			TMF	TRS				17					85.4574061586873		0.353039877096076									8.761506	0.0020736						0.579999304000835	0.3735						0.757467532467533
Macaranga	denticulata	Euphorbiaceae	Angiosperm	T	D	D		Tropical Dry	TDF	TRS			0.29	16.72
Macaranga	involucrata	Euphorbiaceae	Angiosperm	T	E				TMF	TRR				6.214					69.7919999772646	-28.784										3.09	0.000458121						0.781763031989743	0.4						0.74025974025974
Macaranga	tanarius	Euphorbiaceae	Angiosperm	T	E				TMF	TRR				6.96					76.0008914835902	-25.064										3.59	0.000467929		-0.63				0.743687948536794	0.423						0.725324675324675
Machaerium	acutifolium	Fabaceae	Angiosperm	T	E				TS	TRS			81.14						42.3728813559322											2.268	0.000252						0.468956837222968	1.12						0.272727272727273
Machaerium	isadelphum	Fabaceae				E			TMF
Machaerium	kegelii	Fabaceae				E			TMF
Machaerium	milleflorum	Fabaceae				E			TMF
Machaerium	nyctitans	Fabaceae	Angiosperm	T	D				TDF	TRS									78.125											3.672	0.001188						0.307692307692308	0.8225						0.465909090909091
Machaerium	opacum	Fabaceae	Angiosperm	T	D				TS	TRS			56.85																								0.0620526007486026	0.8						0.48051948051948
Machaerium	pittieri	Fabaceae				E			TMF
Machaerium	seemannii	Fabaceae				E			TMF
Machilus	chinensis	Lauraceae	Angiosperm	T	E			Tropical Dry	TMF	TRS			0.09225	6.188888889					108.948371563987	-30.873			-1.98							1.168477492	0.000163689	-0.13	-2.52	-5.78	-5.65	11.65644172	0.727823226294797	0.504771658						0.672226196103896	1.174969325376
Machilus	duthiei	Lauraceae		W		E		Tropical Dry	STF													-2.46	-2.795	0.115					0.885
Machilus	rufipes	Lauraceae	Angiosperm	T	E				TMF	TRS																												0.71						0.538961038961039
Maclura	tinctoria	Moraceae	Angiosperm	T	D	D		Tropical Moist	STF	TRR									42.1940928270042		0.539990650977128	-1.55	-1.85							0.37	0.0046	-0.688	-0.71	-2.25	-1.562	24.67532468	1.17999948080023	0.75						0.512987012987013	0.700779220912
Macrocnemum	roseum	Rubiaceae				E			TMF										62.8231063160261		0.713202593102086
Macropanax	dispermus	Araliaceae		W		E		Tropical Dry	TMF													-1.0428827495	-1.67724
Mallotus	garrettii	Euphorbiaceae		W		E		Tropical Dry	TMF													-0.881186474	-1.559096
Mallotus	paniculatus	Euphorbiaceae	Angiosperm	T	D			Tropical Dry	TMF	TRS			0.551166667	16.53333333					71.2095494706106	-28.704			-1.48							7.65116589	0.000990944	-0.16	-1.32	-2.8	-2.64	25.67567568	0.775193798449612	0.3877822765						0.748193326948052	1.355675675904
Mallotus	wrayi	Euphorbiaceae	Angiosperm	T	D			Tropical Moist	TWF	TRR												-1.625	-2.1925	0.23					0.77			-0.22	-0.53	-0.84	-0.62	122.5806452									2.59870967824
Malpighia	romeroana	Malpighiaceae				E			TMF
Manihot	guaranitica	Euphorbiaceae	Angiosperm	T	D				TDF	TRS									44.0528634361234											4.896	0.00117						0.411522633744856
Manilkara	bidentata	Sapotaceae	Angiosperm	T	E	E		Tropical Moist	TWF	TRR				10.3					52.3560209424084		0.691626252229952	-2.558541164	-3.051426366		17.4543109193					2.786611	0.000567	-0.9	-2.7				0.610001586004124	0.64	-2.20795562635012	-2.56580427446569	0.139882577375118	15.8312236576901	0.31282966666103	0.584415584415584		0.860117422624882
Manilkara	chicle	Sapotaceae	Angiosperm	T	E				TDF	TRS																				0.45	4.8e-05						0.980392156862745	1.04						0.324675324675325
Manilkara	huberi	Sapotaceae		W		E		Tropical Moist	TMF													-1.94375	-2.2482
Manilkara	subsericea	Sapotaceae		W		E		Tropical Dry	STF													-1.91	-2.33		10.79
Mansoa	verrucifera	Bignoniaceae		W		D		Tropical Dry	TDF										57.1			-2.23	-2.51		9.94	0.177
Maquira	guianensis	Moraceae				E			TMF
Margaritaria	nobilis	Phyllanthaceae				E			TMF										69.7909642616318		0.66128598738717
Margbensonia	drouyniana	Podocarpaceae	Gymnosperm	S	E					TRR																						-4.33	-5.9	-7.55	-3.22	23.03030303									5.43515151508
Marila	laxiflora	Calophyllaceae	Angiosperm	T	E	D			TWF	TRR				9.9																	0.0005382							0.48						0.688311688311688
Maripa	panamensis	Convolvulaceae				E			TMF										66.0822656776804		0.591690633312432
Martinella	obovata	Bignoniaceae				E			TMF										69.453809844909		0.639841511902841
Mascagnia	ovatifolia	Malpighiaceae				E			TMF
Maximilianea	gillivraei	Cochlospermaceae	Angiosperm	T	D				TDF	TRS			0.44	7.02					60.6060606060606											7.75	0.003982	-0.85	-1.44	-2.05	-1.2	62.29508197	0.175746924428823	0.3						0.805194805194805	3.588196721472
Mayepea	ramiflora	Oleaceae	Angiosperm	T	E				TMF	TRS																												0.86						0.441558441558442
Mayodendron	igneum	Bignoniaceae	Angiosperm	T	D				TMF	TRS																												0.59						0.616883116883117
Maytenus		Celastraceae		W		E		Tropical Moist	TMF													-2.23166666706731	-2.487746667
Maytenus	obtusifolia	Celastraceae		W		E		Tropical Dry	STF													-2.6	-3.08		19.06
Maytenus	schippii	Celastraceae				E			TMF
Melaleuca	citrolens	Myrtaceae	Angiosperm	T	E				TS	TRS				19.12					183.365793583484	-27.18										1.11	0.00028325						0.38922773325445	0.555						0.63961038961039
Melaleuca	stenostachya	Myrtaceae	Angiosperm	T	E				TS	TRS				24.21					156.413718679255	-26.389										2.74	0.000522553						0.545404963185165	0.6						0.61038961038961
Melaleuca	viridiflora	Myrtaceae	Angiosperm	T	E				TS	TRS				13.65					261.208621890291	-26.929										3.18	0.000840476						0.50623427509783	0.55						0.642857142857143
Melastoma	malabathricum	Melastomataceae	Angiosperm	S	E				TMF	TRS			0.700041667	13					58.0857526437032	-30.692										3.690117722	0.000971672	-0.41	-1.12	-2.88	-2.47	21.59090909	0.403882114888306	0.494216981						0.679079882467532	0.967272727232
Melastoma	sanguineum	Melastomataceae	Angiosperm	S	E			Tropical Dry	TMF	TRS			0.37915	12.735					67.6949742660805	-28.566			-1.4							3.704314971	0.000735058	-0.47	-1.2	-2.67	-2.2	25.85034014	0.512891528570623	0.517593301						0.663900453896104	1.24081632672
Melicope	pteleifolia	Rutaceae	Angiosperm	S	E			Tropical Dry	TMF	TRS			0.3685	11.58416667					66.7784826058153	-29.498			-1.65							2.009848572	0.000184317	-0.21	-2.7	-5.02	-4.81	16.37931034	1.130237236796	0.51110778						0.668111831168831	1.76896551672
Memecylon	ligustrifolium	Melastomataceae	Angiosperm	T	E			Tropical Dry	TMF	TRS			0.038664286	4.075714286					123.183280870958	-31.253			-1.13							0.555775096	7.20276e-05	-0.41	-1.03	-2.11	-1.7	35.18518519	0.765620573756058	0.858852601						0.442303505844156	1.449629629828
Mendoncia	gracilis	Acanthaceae				E			TMF										61.3621038435603		0.680325061251339
Mendoncia	litoralis	Acanthaceae				E			TMF
Michelia	baillonii	Magnoliaceae	Angiosperm	T	E				TMF	TRS																												0.67						0.564935064935065
Michelia	macrostachya	Lecythidaceae							TWF
Miconia		Melastomataceae	Angiosperm	T	E				TWF	TRR																				0.51	0.00045						0.113636363636364
Miconia	acuminata	Melastomataceae		W		E		Tropical Moist	TMF													-1.64486111097756	-2.12455555566667
Miconia	affinis	Melastomataceae				E			TMF
Miconia	albicans	Melastomataceae		W		E		Tropical Dry	TS										153			-1.77	-2.48	0.13	10.34				0.87
Miconia	argentea	Melastomataceae		W		E		Tropical Moist	TMF										109.350415823781		0.639509118173829	-1.504161712	-1.81															0.54						0.649350649350649
Miconia	cuspidata	Melastomataceae	Angiosperm	T	E	E		Tropical Dry	TS	TRS			14.6						96.6000000345828			-2.23	-2.66							5.37	0.000344		-3.4				1.03341552081135	0.74						0.519480519480519
Miconia	dorsiloba	Melastomataceae							TMF
Miconia	elata	Melastomataceae				E			TMF
Miconia	hondurensis	Melastomataceae				E			TMF										87.5477635423691		0.693807876572143
Miconia	impetiolaris	Melastomataceae							TMF
Miconia	leucocarpa	Melastomataceae	Angiosperm	T	E	E		Tropical Dry	TS	TRS			192.14						184.200000012894			-1.42	-1.75							4.73	0.001092		-3.1				0.30166143983737	0.53						0.655844155844156
Miconia	ligustroides	Melastomataceae		W		E		Tropical Dry	TS										131			-2.03	-2.1	0.119	17.2				0.881
Miconia	minutiflora	Melastomataceae	Angiosperm	T	E				TWF	TRR				16.8																	0.001458							0.5						0.675324675324675
Miconia	nervosa	Melastomataceae				E			TMF
Miconia	prasina	Melastomataceae				E			TMF
Micrandra	spruceana	Euphorbiaceae							TWF
Micrandra	sprucei	Euphorbiaceae		W		E		Tropical Moist	TWF													-0.75	-1.12			0.33											0.265002968570749
Microcos	paniculata	Malvaceae		S		E					Tropical
Microdesmis	caseariifolia	Pandaceae	Angiosperm	T	E			Tropical Dry	TMF	TRS			0.085466667	6.6925					53.7289564893653	-30.748			-1.96							1.19631388	0.000170746	-0.27	-2.6	-6.06	-5.79	10.98265896	0.894222428886961	0.643447572						0.582176901298701	1.14219653184
Micropholis	cayennensis	Sapotaceae		W		E		Tropical Moist	TMF													-1.51	-1.88732
Millettia	cubittii	Fabaceae	Angiosperm	W	D	D		Tropical Dry	TDF	TRR												-1.44	-1.605							4.05	0.0002257	-0.1	-0.74	-1.38	-1.28	59.6005833	1.79726815240834	0.52						0.662337662337662	1.76417726568
Millettia	ferruginea	Fabaceae		Tree			Trs
Millettia	pachycarpa	Fabaceae	Angiosperm	W		E		Tropical Dry	TMF													-1.23	-1.52
Minquartia	guianensis	Olacaceae		W		E		Tropical Moist	TMF													-1.17833333293269	-1.611373333
Mischocarpus	pentapetalus	Sapindaceae	Angiosperm	T	E			Tropical Dry	TMF	TRS			0.128535714	6.706071429					62.7040827429632	-30.988			-1.54							1.28189306	0.000172918	-0.44	-1.79	-2.98	-2.54	31.93277311	0.889798460648663	0.502069393						0.673980913636364	2.286386554676
Morisonia	americana	Capparaceae	Angiosperm	W	E	E		Tropical Dry	TDF	TRS									150.6428571			-3.28	-4.08		13.9	0.161				0.14	3.47e-05	-1.09	-2.39	-6.16	-5.07	10.0795756	0.36231884057971	0.6						0.61038961038961	0.96360742736
Mosannona	garwoodii	Annonaceae				E			TMF
Mouriri	myrtilloides	Melastomataceae				E			TMF										96.6509327938863		0.604726027267397
Myracrodruon	urundeuva	Anacardiaceae	Angiosperm	T	D				TDF	TRS									55.5555555555556											16.038	0.001458		-1.8	-5.24		11.04651163	1.08225108225108	1.00316666666667						0.348593073593071	0.79534883736
Myrcia	rostrata	Myrtaceae	Angiosperm	T	E				TS	TRS			132.2																								0.605396504440583	0.87						0.435064935064935
Myrcia	splendens	Myrtaceae				E			TMF
Myrcia	tomentosa	Myrtaceae	Angiosperm	T	D				TS	TRS			230.5																								0.110619101927759	0.82						0.467532467532468
Myrciaria	cauliflora	Myrtaceae	Angiosperm	T	E				TDF	TRS									69.9300699300699											0.558	0.000126						0.4149377593361
Myristica		Myristicaceae							TWF																		0.394	5907.675									0.48825525520096	0.4975						0.676948051948052
Myrospermum	frutescens	Fabaceae							TMF										77.6298044504383		0.715289599236246
Myrsine	coriacea subsp. coriacea	Primulaceae	Angiosperm	T	E	E		Tropical Dry	TS	TRS			14.81						86.9000000144254			-1.63	-1.79							3.25	0.000434		-3.08				0.510398531330141	0.62						0.597402597402597
Myrsine	guianensis	Primulaceae	Angiosperm	T	E	E		Tropical Dry	TS	TRS			246.57						194.099999986918			-1.53	-1.76							2	0.000384		-2.12				0.397889866577862	0.52						0.662337662337662
Myrsine	parvifolia	Primulaceae		W		E		Tropical Dry	STF													-1.94	-2.33		15.32
Myrtaceae		Myrtaceae							TWF																												0.685006777424217
NA	NA								TMF																												0.441259282234702
Nageia	fleuryi	Podocarpaceae	Gymnosperm	T	E					TRR																					5.56e-05		-3.7
Nectandra		Lauraceae	Angiosperm	T	E				TWF	TRR				11.1																	0.0010602							0.55						0.642857142857143
Nectandra	cissiflora	Lauraceae				E			TMF										113.059114407732		0.536002817719567
Nectandra	lineata	Lauraceae				E			TMF										64.7336480107889		0.588318233414919
Nectandra	purpurea	Lauraceae				E			TMF										121.600359631378		0.586966426295338
Neea		Nyctaginaceae	Angiosperm	T	E				TDF	TRS									67.1140939597315											1.2546	0.00018						0.662251655629139
Neea	amplifolia	Nyctaginaceae				E			TMF
Neea	floribunda	Nyctaginaceae		W		E		Tropical Moist	TMF													-1.5325	-1.90604
Neonauclea	tsaiana	Rubiaceae	Angiosperm	T	E				TMF	TRS																												0.77						0.5
Neoscortechinia	kingii	Euphorbiaceae	Angiosperm	W		E		Tropical Moist	TWF										66			-1.5	-1.71		7.57	0.383
Nephelium	chryseum	Sapindaceae	Angiosperm	T	E				TMF	TRS																												0.73						0.525974025974026
Nephelium	lappaceum	Sapindaceae	Angiosperm	T	E	E			TWF	TROP HEATH FOREST	Tropical																					-0.17	-0.76	-1.35	-1.18	64.40677966		0.7102						0.538831168831169	1.957966101664
Normanbya	normanbyi	Arecaceae							TWF																		0.402	6580.525									0.213902047237581	1.0475						0.319805194805195
Ochanostachys	amentacea	Olacaceae							TWF
Ochanostachys	sp.	Olacaceae							TWF
Ochroma	pyramidale	Malvaceae	Angiosperm	W	E	E		Tropical Dry	TMF	TRR									89.6830748482805		0.543876149799638	-1.37	-1.6		25.74					2.1	0.00114	-0.75	-0.95	-1.4	-0.65	84.44444444	0.267379679144385	0.19	-0.69373493704848	-0.882677991407688	0.253149326616485	3.22321072191924	0.219168736661892	0.876623376623377	3.20888888872	0.746850673383515
Ocotea		Lauraceae							TWF
Ocotea	aciphylla	Lauraceae		W		E		Tropical Moist	TWF													-1.29	-1.5			0.27
Ocotea	cernua	Lauraceae				E			TMF										84.9254514123024		0.569991324580645
Ocotea	diospyrifolia	Lauraceae	Angiosperm	T	E				STF	TRR																												0.5562						0.638831168831169
Ocotea	insularis	Lauraceae	Angiosperm	T	E				TWF	TRR				12.6																	0.0008244							0.58						0.623376623376623
Ocotea	notata	Lauraceae		W		E		Tropical Dry	STF													-2.01	-2.09		14.79
Ocotea	oblonga	Lauraceae				E			TMF										116.115981119353		0.700287325057093
Ocotea	percurrens	Lauraceae		W		E		Tropical Moist	TMF													-1.31166666706731	-1.722306667
Ocotea	puberula	Lauraceae				E			TMF										77.7702854574061		0.711626565810424
Ocotea	whitei	Lauraceae				E			TMF										113.995654454184		0.57765410225638
Odontadenia	puncticulosa	Apocynaceae				E			TMF
Oenocarpus	mapora	Arecaceae				E			TMF
Omphalea	diandra	Euphorbiaceae				E			TMF										81.5913688469319		0.631115828441046
Oreopanax	nubigenus	Araliaceae	Angiosperm	T	E				TWF	TRR																				0.48	0.00026						0.188679245283019
Ormosia	amazonica	Fabaceae							TMF
Ormosia	coccinea	Fabaceae							TMF										128.343447965835		0.500525655749547
Ormosia	macrocalyx	Fabaceae				E			TMF										120.926050797932
Orophea	creaghii	Annonaceae		W		E		Tropical Dry	TMF													-1.053944301	-1.7007786665
Osmoxylon		Araliaceae							TMF										90.6846153756522		0.674250031346472	-1.03903365430435	-1.29456344695652		25.7169212922174
Ostodes	macrophylla	Euphorbiaceae							TWF
Ouratea		Ochnaceae	Angiosperm	T	E				TDF	TRS									97.0873786407767											0.6174	9e-05						0.72992700729927
Ouratea	castaneifolia	Ochnaceae	Angiosperm	T	E				TS	TRS			15.03																								0.420136292213194	0.661746362						0.57029457012987
Ouratea	hexasperma	Ochnaceae	Angiosperm	T	E	E		Tropical Dry	TS	TRS			21.2616	9.7					120.729567762727	-26.251041665			-2.34							1.345	0.0007785	-0.535	-1.715	-4.965	-4.6975	11.772738185	0.194435683814648	0.4275						0.722402597402597	0.807609839491
Ouratea	lucens	Ochnaceae	Angiosperm	W	E	E		Tropical Moist	TMF	TRR									81.30081301			-1.622856426	-1.84									-0.5	-1.8	-4.5	-4	14.07407407									1.01333333304
Pachira	quinata	Malvaceae				D			TMF																													0.313						0.796753246753247
Pachira	sessilis	Malvaceae				E			TMF										86.1429534726905		0.680478262330436
Pachira	sordida	Malvaceae		W		E		Tropical Moist	TWF													-1.55	-1.98	0.078		0.4			0.922
Pachyptera	kerere	Bignoniaceae				E			TMF
Palaquium	sumatrana	Sapotaceae	Angiosperm			E		Tropical Dry															-1.9
Palaquium	sumatranum	Sapotaceae		W		D		Tropical Moist	TMF													-1.66	-1.88		24.88	0.383
Palicourea	acuminata	Rubiaceae				E			TMF
Palicourea	guianensis	Rubiaceae				E			TMF
Palorojo	NA								TWF
Parapiptadenia	rigida	Fabaceae	Angiosperm	T	E				STF	TRR																												0.859						0.442207792207792
Parashorea		Dipterocarpaceae		W		E		Tropical Moist	TWF										46			-1.7	-1.83		37.03	0.179
Passiflora	vitifolia	Passifloraceae				E			TMF										34.6145201168802		0.824246508219876
Paullinia	baileyi	Sapindaceae				E			TMF
Paullinia	bracteosa	Sapindaceae				E			TMF
Paullinia	fibrigera	Sapindaceae				E			TMF
Paullinia	fuscescens	Sapindaceae				E			TMF
Paullinia	pterocarpa	Sapindaceae				E			TMF
Paullinia	rugosa	Sapindaceae				E			TMF										72.4881995954147		0.563544210938335
Paullinia	turbacensis	Sapindaceae				E			TMF										40.9080692290402		0.446152478117056
Payena	endertii	Sapotaceae	Angiosperm	T	D				TWF	TRR																						-0.12	-0.63	-1.14	-1.02	74.50980392		0.633333333333333						0.588744588744589	1.877647058784
Peltophorum	dubium	Fabaceae	Angiosperm	T	D	D		Tropical Moist	STF	TRR									30.2114803625378			-1.1	-1.36							2.78	0.013	-0.279	-1.03	-2.03	-1.751	38	2.12000050880012	0.56						0.636363636363636	1.5656
Pentace	adenophora	Malvaceae	Angiosperm	T	E				TWF	TRR																							-0.19	-0.42	-0.42	165.2173913									1.25565217388
Pentaclethra	macroloba	Fabaceae							TWF										62.9326620516048																		0.655241935416667
Pentagonia	macrophylla	Rubiaceae				E			TMF
Pentaphylax	euryoides	Pentaphylacaceae		T		E					Tropical
Peperomia	obtusifolia	Piperaceae							TWF
Pera		Euphorbiaceae							TWF
Perebea	guianensis	Moraceae		W		E		Tropical Moist	TMF													-1.42583333293269	-1.817293333
Perebea	xanthochyma	Moraceae				E			TMF										90.8069229040234		0.48062690425865
Persea	caerulea	Lauraceae							TWF
Pertusadina	metcalfii	Rubiaceae		T		E					Tropical
Petalostigma	banksii	Picrodendraceae	Angiosperm	T	E				TS	TRS				15.79					142.102990391087	-26.972										4.08	0.00057313						0.739251286297238	0.728						0.527272727272727
Petrea	volubilis	Verbenaceae				E			TMF
Phaseolodes	sericeum	Fabaceae							TWF
Phlebodium	areolatum	Polypodiaceae		F		E		Tropical Moist														-1.54	-1.69	0.0740000000000001	27.6				0.926
Phoebe	puwenensis	Lauraceae	Angiosperm	T	E				TMF	TRS																												0.57						0.62987012987013
Phyllanthus		Phyllanthaceae	Angiosperm	T	E				TDF	TRS									41.3223140495868											1.0728	0.000288						0.350877192982456
Phyllostylon	rhamnoides	Ulmaceae	Angiosperm	T	E				TDF	TRS									53.7634408602151											0.621	0.000288						0.188679245283019	0.7486						0.513896103896104
Picramnia	latifolia	Picramniaceae				E			TMF										81.8161384580805		0.585187676915292
Pinus	roxburghii	Pinaceae		W		E		Tropical Dry	STF													-1.005	-1.475	0.154					0.846
Piper	aduncum	Piperaceae	Angiosperm	S	E				TWF	TRR			0.55																	7.82	0.00025						2.22222222222222
Piper	aequale	Piperaceae				E			TMF
Piper	arboreum	Piperaceae				E			TMF
Piper	colonense	Piperaceae				E			TMF
Piper	cordulatum	Piperaceae				E			TMF
Piper	multiplinervium	Piperaceae				E			TMF										28.9952798381659		0.93473391114748
Piper	perlasense	Piperaceae				E			TMF
Piper	reticulatum	Piperaceae				E			TMF										68.8918858170375		0.469496461262383
Piper	schiedeanum	Piperaceae				E			TMF
Piptadenia	obliqua	Fabaceae	Angiosperm	T					TDF	TRS									50											1.53			-1.94					0.73						0.525974025974026
Piptocarpha	rotundifolia	Asteraceae		W		E		Tropical Dry	TS										160			-1.4	-1.75	0.102	10.86				0.898
Pistacia	weinmannifolia	Anacardiaceae	Angiosperm	T	E	E		Tropical Dry	TMF	TRR												-2.57	-3.3875							2.66	0.0004995	-0.63	-3.98	-7.33	-6.69	11.35249206	0.535245945511963	0.69						0.551948051948052	1.807316735952
Planchonia	careya	Lecythidaceae	Angiosperm	T	D	D		Med./ Dry Temperate	TMF	TRR				10.308					92.7904397777326	-26.529										9.81	0.0022132135						0.456233005433504	0.49						0.681818181818182
Platea	excelsa	Metteniusaceae							TWF																												0.654451018635114
Platymiscium	pinnatum	Fabaceae				E			TMF										79.3276177632213		0.64414987157603
Platypodium	elegans	Fabaceae				E			TMF										82.1757698359182		0.734571637495971
Pleonotoma	variabilis	Bignoniaceae				E			TMF										46.1901550910317		0.582092814051177
Pleopeltis	mexicana	Polypodiaceae		F		E		Tropical Moist														-1.23	-1.35	0.047	41.4				0.953
Plumeria	rubra	Apocynaceae	Angiosperm	T					TDF	TRS									71.00000001136																			0.35						0.772727272727273
Podocarpus	alpinus var. lawrencei	Podocarpaceae	Gymnosperm	S	E					TRR																				0.25	0.00012	-3.92	-5.6	-7.08	-3.16	25.67567568									5.75135135232
Podocarpus	latifolius	Podocarpaceae	Gymnosperm	T	E				G	TRR																				0.349727	0.000115	-0.5	-1.74	-2.8	-2.3	35.8490566	0.319930383148627	0.469						0.695454545454546	2.49509433936
Podocarpus	neriifolius	Podocarpaceae	Gymnosperm	T	E				TWF	TRR			0.11																	0.45	0.000125						0.309427960529369	0.476875						0.690340909090909
Pogonopus	tubulosus	Rubiaceae	Angiosperm	T	D				TDF	TRS									37.1747211895911											1.98	0.000144						1.41043723554302
Poincianella	eriostachys	Fabaceae	Angiosperm	T	D				TDF	TRS									48.99999998873											3.325			-2.07					0.775						0.496753246753247
Poincianella	pluviosa	Fabaceae	Angiosperm	T	E				TDF	TRS									57.4712643678161											7.578	0.00135						0.558659217877095	0.89						0.422077922077922
Polaquem	dasyphyUum								TWF
Polyalthia	glauca	Annonaceae							TWF
Polyalthia	rumphii	Annonaceae							TWF
Polylepis	tarapacana	Rosaceae		W		E		Tropical Dry	TCF													-1.42	-2.24
Polypodium	plebeium	Polypodiaceae		F		E		Tropical Moist														-1.66	-1.77	0.0509999999999999	60.3				0.949
Polypodium	puberulum	Polypodiaceae		F		E		Tropical Moist														-1.46	-1.61	0.0909999999999999	25.6				0.909
Polyscias	elegans	Araliaceae	Angiosperm	T	E				TMF	TRR				3.66																4.35								0.38						0.753246753246753
Polyspora	axillaris	Theaceae		T		E					Tropical
Pometia	pinnata	Sapindaceae	Angiosperm	T	E				TMF	TRS																												0.63						0.590909090909091
Posoqueria	latifolia	Rubiaceae				E			TMF										120.195549561699		0.638443942260251
Poulsenia	armata	Moraceae	Angiosperm	T	E	E			TWF	TRR				11.8					98.6176668914363		0.619516311652737										0.000711							0.43						0.720779220779221
Pourouma	bicolor	Urticaceae	Angiosperm	T	D	D			TWF	TRR				13.7					118.116430658575												0.0008982							0.45						0.707792207792208
Pourouma	tomentosa	Urticaceae		W		E		Tropical Moist	TMF													-1.27083333293269	-1.688333333
Pouteria		Sapotaceae							TWF
Pouteria	anomala	Sapotaceae							TMF										98.377215625		0.63692488379708	-1.352661298	-1.86608854		23.47604085575
Pouteria	cladantha	Sapotaceae		W		E		Tropical Moist	TMF													-1.55666666706731	-1.926146667
Pouteria	filipes	Sapotaceae		W		E		Tropical Moist	TMF													-1.885	-2.19932
Pouteria	firma	Sapotaceae							TWF																												0.638819375784672
Pouteria	fossicola	Sapotaceae				E			TMF										80.6922904023376		0.571722770578064
Pouteria	gongrijpii	Sapotaceae		W		E		Tropical Moist	TMF													-1.73583333293269	-2.075213333
Pouteria	reticulata	Sapotaceae				E			TMF										85.6746834494643		0.557194766497414
Pouteria	stipitata	Sapotaceae				E			TMF										81.1418296246347		0.640062534033724
Prionostemma	asperum	Celastraceae	Angiosperm	L		E		Tropical Moist	TMF													-1.72498726	-2.07
Prioria	copaifera	Fabaceae	Angiosperm	T	D				TMF	TRR									109.103169251517		0.552620895233991										6.3e-05	-0.8	-1.6	-2.7	-1.9	34.54545455		0.413571428571429						0.731447124304267	2.2109090912
Protium		Burseraceae	Angiosperm	T	E				TS	TRS									100.806451612903											7.4	0.0032							0.44						0.714285714285714
Protium	confusum	Burseraceae				E			TMF
Protium	costaricense	Burseraceae				E			TMF										54.8437851202517		0.513175888467559
Protium	gallicum	Burseraceae		W		E		Tropical Moist	TMF													-1.95010416646634	-2.49719333325
Protium	icicariba	Burseraceae		W		E		Tropical Dry	STF													-2.32	-2.47		14.98
Protium	opacum	Burseraceae		W		E		Tropical Moist	TMF													-1.56083333333333	-1.98184444433333
Protium	panamense	Burseraceae	Angiosperm	T	E	E		Tropical Moist	TWF	TRR									71.9424460431655		0.437984808234571	-2.228362288	-2.662673758							1.958159		-0.2	-1.7				0.579999304000835	0.6						0.61038961038961
Protium	sagotianum	Burseraceae		W		E		Tropical Moist	TMF													-2.11583333323317	-2.28685333325
Protium	tenuifolium	Burseraceae				E			TMF										92.4027871431782		0.538488327167592	-1.36057459988	-1.74404497188		23.5053321978
Protium	trifoliolatum	Burseraceae		W		E		Tropical Moist	TMF													-1.98166666646634	-2.3119866665
Pseudobombax	septenatum	Malvaceae	Angiosperm	W	D	D		Tropical Dry	TMF	TRR									128.824955169313		0.957572460910076	-0.91	-1.28		12.8					1.6	0.000515	-0.6	-0.9	-1.4	-0.8	76	0.304878048780488	0.25	-0.984171669367811	-1.13759518167599	0.15171743267672	7.07488707317462	0.423891756280627	0.837662337662338	2.736	0.84828256732328
Pseudopiptadenia	psilostachya	Fabaceae		W		E		Tropical Moist	TMF													-1.3275	-1.73548
Psidium	friedrichsthalianum	Myrtaceae				E			TMF										97.2128568217577		0.665843960931961
Psidium	sartorianum	Myrtaceae	Angiosperm	T	D				TDF	TRS									58.1395348837209											0.9955	0.00027						0.324675324675325	0.7575						0.508116883116883
Psychotria	asiatica	Rubiaceae	Angiosperm	S	E				TMF	TRS			0.082233333	5.908666667					70.3596074117123	-29.604										0.866366867	0.000177888	-0.3	-2.51	-6.9	-6.6	8.656036446	0.522204119146092	0.590715218						0.61641868961039	0.8690660591784
Psychotria	brachiata	Rubiaceae							TWF
Psychotria	chagrensis	Rubiaceae		W		E		Tropical Dry	TMF													-0.965	-1.075
Psychotria	cyanococca	Rubiaceae				E			TMF
Psychotria	deflexa	Rubiaceae				E			TMF
Psychotria	graciliflora	Rubiaceae				E			TMF
Psychotria	grandis	Rubiaceae				E			TMF
Psychotria	hoffmannseggiana	Rubiaceae		W		E		Tropical Dry	TMF										43.6515832240166			-1.1975	-1.345
Psychotria	horizontalis	Rubiaceae	Angiosperm	W	E	E		Tropical Moist	TMF	TRR									43.29004329			-1.013010062	-1.86								1.48e-05	-2.3	-4.9	-6.2	-3.9	29.23076923	0.416666666666667								5.72923076908
Psychotria	limonensis	Rubiaceae		W		E		Tropical Dry	TMF										60.2559586074358			-1.0145	-1.115
Psychotria	marginata	Rubiaceae		W		E		Tropical Dry	TMF										79.4328234724281			-1.2675	-1.365
Psychotria	racemosa	Rubiaceae				E			TMF
Psychotria	tenuifolia	Rubiaceae				E			TMF
Pterocarpus	rohrii	Fabaceae				E			TMF										88.5592267925376		0.597837909213762
Pterogyne	nitens	Fabaceae	Angiosperm	T	E				TDF	TRS									53.475935828877											6.408	0.001026						0.584795321637427	0.692625						0.550243506493507
Pterospermum	menglunense	Malvaceae	Angiosperm	W	E	E		Tropical Dry	TMF	TRS												-1.088586996	-1.7640713335															0.49						0.681818181818182
Pygeum	topengii	Rosaceae	Angiosperm	T	E			Tropical Dry	TMF	TRS			0.081965217	7.059130435					66.6102905144075	-30.363			-1.28							4.780292958	0.000461154	-0.23	-1.2	-2.99	-2.76	21.22905028	1.05374077976818	0.475116363						0.691482881168831	1.01899441344
Pyrrosia	adnascens	Polypodiaceae		F		E		Tropical Moist														-0.57	-0.64	0.0184804687	25.6	0.17			0.9815195313
Pyrrosia	angustata	Polypodiaceae		F		E		Tropical Moist														-0.49	-0.54	0.0147	25	0.25			0.9853
Quadrella	indica	Capparaceae	Angiosperm	T	E					TRS																				0.9								0.56						0.636363636363636
Qualea	dichotoma	Vochysiaceae	Angiosperm	T	D	D		Tropical Dry	TS	TRS			88.9						143			-2.36	-2.7	0.083	22.45				0.917								0.105521296308021	0.576507277						0.625644625324675
Qualea	grandiflora	Vochysiaceae	Angiosperm	T	D	D		Tropical Dry	TS	TRS			0.27	11.9					158.498114329789			-1.91	-2.2	0.0990000000000001	17.54				0.901	1.75333333333333	0.000726							0.565333333333333						0.632900432900433
Qualea	parviflora	Vochysiaceae	Angiosperm	T	D	D		Tropical Dry	TS	TRS			20.2291428571429	10.4					148.81745502998	-26.7141666675			-2.21875							1.2625	0.000594		-2.025	-5.2425	-5.2425	11.95292272	0.212606588507556	0.453166666666667	-1.29544381982286	-1.49207485427958	0.141924739047179	9.830081777427	0.277555723937647	0.705735930735931	0.96818674032	0.858075260952821
Qualea	rosea	Vochysiaceae		W		E		Tropical Moist	TMF													-1.38	-1.77916
Quararibea	asterolepis	Malvaceae				D			TMF										75.5975125496366		0.616371558533825
Quararibea	duckei	Malvaceae		W		E		Tropical Moist	TMF													-1.723	-2.064536
Quassia	amara	Simaroubaceae				E			TMF
Quercus	asymmetrica	Fagaceae		T		E					Tropical
Quercus	floribunda	Fagaceae		W		E		Tropical Dry	STF													-2.13	-2.45	0.12					0.88
Quercus	ithaburensis subsp. macrolepis	Fagaceae		Tree			Trs					-3.1
Quercus	leucotrichophora	Fagaceae		W		E		Tropical Dry	STF													-1.915	-2.405	0.139					0.861
Quercus	oleoides	Fagaceae	Angiosperm	T	E	E	M	Tropical Dry	TDF	TRS		-2.728889472					-3.535419548		180			-2.616782742	-3.12		23.8					2.1	0.000199	-2.1	-3.03	-3.9	-1.8	43.67816092	0.847457627118644	0.86						0.441558441558442	5.293793103504
Quisqualis	indica	Combretaceae	Angiosperm	W		E		Tropical Dry	TMF										40.7380277804113			-1.12	-1.4
Racosperma	crassicarpum	Fabaceae	Angiosperm	T	E				TMF	TRR				13.414					78.9290000226258	-29.05										8.65	0.00051442						1.78963870773768	0.51						0.668831168831169
Racosperma	flavescens	Fabaceae	Angiosperm	T	E				TMF	TRR				13.51					145.47295847954	-27.284										7.58	0.000836644						0.849400008484332	0.7						0.545454545454545
Radermachera	microcalyx	Bignoniaceae	Angiosperm	T	E				TMF	TRS																												0.57						0.62987012987013
Randia	armata	Rubiaceae		W		E		Tropical Dry	TDF										64.8085712145051		0.648909642140683	-2.06	-2.365
Rauvolfia	littoralis	Apocynaceae							TMF
Rehdera	trinervis	Verbenaceae	Angiosperm	T	D	D	Trs	Tropical Dry	TDF	TRS		-1.080934904					-1.554661601		170			-1.130940445	-1.37056928		19					1.72	0.000262	-0.7	-2.8	-4.7	-4	20	0.819672131147541								2.24
Remijia	morilloi	Rubiaceae		W		E		Tropical Moist	TWF										354.813389233575			-1.41	-1.95	0.1738		0.21			0.8262
Retiniphyllum	concolor	Rubiaceae		W		E		Tropical Moist	TWF										162.181009735893			-1.5	-1.87	0.1312		0.18			0.8688
Retrophyllum	comptonii	Podocarpaceae	Gymnosperm	T	E					TRR																				0.45	0.000151						0.285714285714286
Rhizophora	mangle	Rhizophoraceae	Angiosperm	T	E				TM	TRS			0.0965						160.076540072288											1.28125	0.00024825	-3.345	-5.8075	-6.7175	-3.3725	51.4502781175	0.314198738856273	0.897714285714286						0.417068645640074	11.9518996066953
Rhododendron	arboreum	Ericaceae		W		E		Tropical Dry	STF													-1.68	-1.915	0.0784999999999999					0.9215
Rhodomyrtus	tomentosa	Myrtaceae	Angiosperm	S	E			Tropical Dry	TMF	TRS			0.681	18.56666667					98.5117304852715	-31.376			-1.29							3.219295929	0.000604124	-0.23	-1.1	-3.16	-2.93	18.44660194	0.548847420417124	0.670479798						0.564623507792208	0.81165048536
Rhynchosia	pyramidalis	Fabaceae							TMF										47.2016183412003		0.479792720863815
Rinorea	anguifera	Violaceae	Angiosperm			E		Tropical Dry											38			-1.39	-1.75		17.84	0.372
Rinorea	sylvatica	Violaceae				E			TMF
Rosenbergiodendron	formosum	Rubiaceae				E			TMF
Roupala		Proteaceae		W				Tropical Dry	TS													-2.46	-2.78	0.037	20.51				0.963
Rourea	glabra	Connaraceae				E			TMF
Ruagea	pubescens	Meliaceae							TWF
Ruprechtia	fusca	Polygonaceae	Angiosperm	T	D					TRS																				2.4								0.625						0.594155844155844
Samanea	saman	Fabaceae							TDF																												0.336700336700337	0.364						0.763636363636364
Santiria	apiculata	Burseraceae							TWF																												0.425726564622971
Santiria	mollis	Burseraceae	Angiosperm	T					TWF	TRR																							-0.2	-0.61	-0.61	92.68292683									0.74146341464
Santiria	operculata	Burseraceae							TWF
Santiria	tomentosa	Burseraceae							TWF
Sapindus	saponaria	Sapindaceae		W		D		Tropical Dry	TDF										51.3			-1.58	-2.14
Sapium		Euphorbiaceae							TMF										104.742638795235		0.826090560074406
Sapium	glandulosum	Euphorbiaceae				D			TMF										110.54918708324		0.629453218172067
Saprosma	ternata	Rubiaceae		W		E		Tropical Dry	TMF													-0.8851304775	-1.3999066665
Sarcosperma	laurinum	Sapotaceae	Angiosperm	T	E			Tropical Dry	TMF	TRS			0.0762	4.926666667					77.010266109968	-31.233			-1.75							1.245085199	0.000161984	-0.32	-3.14	-7.86	-7.54	8.050847458	0.788432123878455	0.550593553						0.642471718831169	1.0111864407248
Schefflera	heptaphylla	Araliaceae	Angiosperm	T	E			Tropical Dry	TMF	TRS			0.167416667	9.308333333					115.482318018302	-30.018			-1.56							2.749506831	0.000576474	-0.26	-2.59	-4.53	-4.27	19.58762887	0.556405619696759	0.470998047						0.694157112337662	2.029278350932
Schefflera	macrocarpa	Araliaceae	Angiosperm	T	E	E		Tropical Dry	TS	TRS			39.6015	16.3					242.09600282601	-26.71			-1.671875							2.95	0.0004695	-0.31	-2.3	-3.95	-3.795	23.174157305	0.445280150412905	0.52	-1.33710419591433	-1.56365681562532	0.133787173337021	9.22863788469921	0.287988876883843	0.662337662337662	2.13202247206	0.866212826662979
Schefflera	morototoni	Araliaceae	Angiosperm	T	E				TS	TRS			396.8																			-0.98	-1.53	-1.84	-0.86	82.60869565	0.247766396836558	0.426614583333333	-0.738937060118402	-0.904713637889592	0.13563586712929	5.58333876823401	0.328027403348365	0.722977543290043	5.05565217378	0.86436413287071
Schefflera	rodriguesiana	Araliaceae	Angiosperm	T	E				TWF	TRR																				0.65	0.00063						0.126582278481013
Schima	superba	Theaceae	Angiosperm	T	E			Tropical Dry	TMF	TRS			0.336866667	12.95333333					77.8004043137636	-30.312			-1.54							2.817955752	0.000440984	-0.97	-5.19	-8.99	-8.02	10	0.694222678866473	0.571169564						0.629110672727273	2.076
Schinopsis	brasiliensis	Anacardiaceae	Angiosperm	T	D				TDF	TRS									56.4971751412429											2.304	0.000324						0.72463768115942	1.23						0.201298701298701
Schinus	terebinthifolius	Anacardiaceae	Angiosperm			E		Tropical Dry															-2.5
Schizolobium	parahyba	Fabaceae							TMF																												0.892800482819411
Semecarpus	reticulatus	Anacardiaceae	Angiosperm	T	E				TMF	TRS																												0.58						0.623376623376623
Senegalia	hayesii	Fabaceae				E			TMF
Senna	dariensis	Fabaceae				D			TMF
Serjania	circumvallata	Sapindaceae				E			TMF										50.5731625084289		0.582345054122158
Serjania	mexicana	Sapindaceae				E			TMF										57.4848280512475		0.576308014710738
Serjania	paucidentata	Sapindaceae				E			TMF										61.6992582602832		0.744861185213594
Serjania	trachygona	Sapindaceae				E			TMF
Shorea		Dipterocarpaceae	Angiosperm	W	D	E		Tropical Moist	TMF	TRR									47			-1.10075550183333	-1.4221004445		25	0.376						-0.36	-0.5	-0.85	-0.67	114.55641686		0.453333333333333						0.705627705627706	2.2911283372
Shorea	lepidota	Dipterocarpaceae	Angiosperm			E		Tropical Dry											55			-1.21	-1.35		23.78	0.51
Shorea	leprosula	Dipterocarpaceae							TWF
Shorea	macroptera	Dipterocarpaceae	Angiosperm			E		Tropical Dry											69			-0.78	-0.955		25.14	0.703
Shorea	ovalis	Dipterocarpaceae	Angiosperm	T	E				TWF	TRR																						-0.15	-0.39	-0.63	-0.48	158.3333333		0.43						0.720779220779221	2.46999999948
Shorea	robusta	Dipterocarpaceae		W		E		Tropical Dry	STF										97.7237220955811			-1.725	-2.135	0.178					0.822
Simarouba	amara	Simaroubaceae	Angiosperm	T	E	E	Trs	Tropical Dry	TDF	TRS		-1.082219909		17.5			-2.59200164		160			-1.843893324	-2.21		10.8					1.2	0.0011046	-1.5	-2	-2.7	-1.2	54.28571429	0.588235294117647	0.41	-1.91604232316396	-2.08038158740773	0.0272549207556201	14.6042934809413	0.654978160166623	0.733766233766234	4.3428571432	0.97274507924438
Simira	rubescens	Rubiaceae	Angiosperm	T	D				TDF	TRS									62.111801242236											4.122	0.000612						0.649350649350649	0.8						0.48051948051948
Sindora	leiocarpa	Fabaceae	Angiosperm	T	D				TWF	TROP HEATH FOREST																						-0.27	-0.86	-1.45	-1.18	64.40677966		0.51						0.668831168831169	2.215593220304
Sindora	sp.	Fabaceae							TWF
Siparuna	guianensis	Siparunaceae				E			TMF
Siparuna	pauciflora	Siparunaceae				E			TMF
Sloanea	garckeana	Elaeocarpaceae		W		E		Tropical Moist	TMF													-1.1675	-2.408706667
Sloanea	terniflora	Elaeocarpaceae				D			TMF										110.586648685098		0.535683507525476
Sloanea	tomentosa	Elaeocarpaceae		W		E		Tropical Dry	TMF													-0.9809140295	-1.56934
Smilax	febrifuga	Smilacaceae				E			TMF
Solanum	asperum	Solanaceae				E			TMF										40.7956844234659		0.813105360212499
Solanum	circinatum	Solanaceae				E			TMF
Solanum	hayesii	Solanaceae				E			TMF										51.2474713418746		0.570328263573803
Solanum	lancaeifolium	Solanaceae				E			TMF										95.751854349292		0.604589751323451
Solanum	lycocarpum	Solanaceae		W		E		Tropical Dry	TS													-1.23	-1.98	0.126	14.4				0.874
Solanum	riparium	Solanaceae	Angiosperm	T	E				TDF	TRS									41.6666666666667											11.286	0.001098	-0.95	-2.1	-3.63	-2.68	24.83660131	1.00502512562814								2.08627451004
Solanum	steyermarkii	Solanaceae				E			TMF
Sorocea	affinis	Moraceae				E			TMF
Spachea	membranacea	Malpighiaceae				E			TMF										57.7657900651832
Spondias	mombin	Anacardiaceae	Angiosperm	T	D	D			TDF	TRS									46.5116279069767		0.762957609186162									8.136	0.001062						0.570940044624255	0.3914375						0.745819805194805
Spondias	purpurea	Anacardiaceae	Angiosperm	T	D				TDF	TRS																				2.9								0.39	-1.43590077294335	-1.5238789460803	0.02086753156268	24.2728445434823	0.638551348917706	0.746753246753247		0.97913246843732
Spondias	radlkoferi	Anacardiaceae				D			TMF										77.9950550685547		0.776262495680053
Stemonurus	umbellatus	Stemonuraceae	Angiosperm	T					TWF	TROP HEATH FOREST																							-0.18	-0.95	-0.95	49.35064935		0.61						0.603896103896104	0.35532467532
Stenostomum	acreanum	Rubiaceae		W		E		Tropical Moist	TMF													-1.38166666706731	-1.780546667
Sterculia	apetala	Malvaceae				D			TMF										108.039259758747		0.459919236349502
Sterculia	multiovula	Malvaceae		W		E		Tropical Moist	TMF													-1.95583333293269	-2.258253333
Sterculia	rubiginosa	Malvaceae							TWF
Stigmaphyllon	lindenianum	Malpighiaceae				E			TMF
Stizophyllum	inaequilaterum	Bignoniaceae				E			TMF
Strombosia	rotundifolia	Olacaceae							TWF
Strombosia	sp.	Olacaceae							TWF
Strychnos	panamensis	Loganiaceae				E			TMF										77.2083614295347		0.639854273296186
Strychnos	toxifera	Loganiaceae				E			TMF
Stryphnodendron		Fabaceae		W		D		Tropical Dry	TS													-2.2	-2.55	0.155	25.68				0.845
Stryphnodendron	obovatum	Fabaceae		W		D		Tropical Dry	TS													-1.99	-2.5	0.154	14.44				0.846
Stylogyne	turbacensis	Primulaceae				E			TMF
Styrax	camporum	Styracaceae	Angiosperm	T	E	E		Tropical Dry	TS	TRS			97.51						210			-2.65	-2.9	0.057	29.47				0.943								0.304144578166677	0.566112266						0.632394632467532
Styrax	ferrugineus	Styracaceae	Angiosperm	T	E	E		Tropical Dry	TS	TRS			112.41						176.100000007942	-28.67		-2.12	-2.49		19.66					2.59	0.000724666666666667		-3.35				0.308838727273887	0.49						0.681818181818182
Styrax	pohlii	Styracaceae	Angiosperm	T	E	E		Tropical Dry	TS	TRS									122.199999994721			-2.07	-2.46							3.45	0.00069		-2				0.495049504950495	0.54						0.649350649350649
Sumbaviopsis	albicans	Euphorbiaceae		W		E		Tropical Dry	TMF													-1.3341669525	-2.2004033335
Swartzia	racemosa	Fabaceae							TMF										109.70496586		0.646985508547963	-1.64397940680952	-1.9932584817619		36.6429177228571
Swartzia	simplex	Fabaceae		W		E		Tropical Moist	TMF										63.69426752			-1.621530637	-1.88
Swartzia	simplex var. grandiflora	Fabaceae				E			TMF										93.7289278489548		0.407738675115685
Swartzia	simplex var.ochnacea	Fabaceae				D			TMF										87.6601483479434		0.57486955907188
Sweetia	fruticosa	Fabaceae	Angiosperm	T	E				TDF	TRS									51.0204081632653											8.172	0.000648						1.26422250316056	0.783333333333333						0.491341991341992
Swietenia	macrophylla	Meliaceae	Angiosperm	T	D	E	Trs	Tropical Dry	TDF	TRS		-2.024781035					-2.867442485					-1.792933582	-2.15							1.2	0.000144	-1.3	-2.2	-3.1	-1.8	42.22222222	1.19047619047619	0.519545454545455						0.662632821723731	3.71555555536
Symphonia	globulifera	Clusiaceae				E			TMF										105.192178017532		0.629110896495685
Symplocos	cochinchinensis	Symplocaceae	Angiosperm	T	D				TMF	TRS																												0.52						0.662337662337662
Symplocos	lanceolata	Symplocaceae	Angiosperm	T	E	E		Tropical Dry	TS	TRS									145.19999999152			-1.29	-1.45							1.62	0.000417		-1.5				0.359712230215827	0.38						0.753246753246753
Symplocos	mosenii	Symplocaceae	Angiosperm	T	E	E		Tropical Dry	TS	TRS									122.900000003331			-1.68	-1.95							4.78	0.000856		-1.6				0.531914893617021	0.48						0.688311688311688
Synaedrys	acuminatissima	Fagaceae							TWF																												0.749075384246042
Syzygium	acuminatissimum	Myrtaceae	Angiosperm	T	E			Tropical Dry	TMF	TRS			0.221714286	7.765238095					79.1114770400175	-32.965			-1.47							3.325835438	0.000369638	-0.58	-1.94	-3.85	-3.27	19.89528796	0.90284486416699	0.604219115						0.607649925324675	1.543874345696
Syzygium	ampullarium	Myrtaceae	Angiosperm	T	E				TWF	TROP HEATH FOREST																						-0.39	-0.6	-0.81	-0.42	180.952381									4.342857144
Syzygium	bankense	Myrtaceae	Angiosperm	T	E				TWF	TROP HEATH FOREST																							-1.26	-2.79	-2.79	24.83660131									1.251764706024
Syzygium	cumini	Myrtaceae	Angiosperm			E		Tropical Dry															-1.69
Syzygium	graveolens	Myrtaceae							TWF																		0.42025	4504.725									0.452040774223942	0.555						0.63961038961039
Syzygium	johnsonii	Myrtaceae							TMF																												3.653647026
Syzygium	levinei	Myrtaceae	Angiosperm	T	E			Tropical Dry	TMF	TRS			0.088825	7.175833333					88.983132070959	-31.334			-1.75							1.969515483	0.000273465	-0.25	-1.37	-3.74	-3.49	16.03375527	0.813219699433999	0.719426407						0.532839995454545	0.878649788796
Syzygium	megacarpum	Myrtaceae	Angiosperm			E		Tropical Dry															-1.17
Syzygium	muelleri	Myrtaceae	Angiosperm	T	E				TWF	TROP HEATH FOREST																						-0.22	-0.54	-0.86	-0.64	118.75		0.87						0.435064935064935	2.565
Syzygium	rehderianum	Myrtaceae	Angiosperm	T	E			Tropical Dry	TMF	TRS			0.061533333	7.506					107.947015241269	-29.96			-1.85							1.4892222	0.00026875	-0.37	-1.71	-5.9	-5.53	9.069212411	0.640959901548559	0.730804604						0.525451555844156	0.6203341289124
Syzygium	sayeri	Myrtaceae	Angiosperm			E		Tropical Dry															-1.86
Syzygium	szemaoense	Myrtaceae	Angiosperm	T	E	E		Tropical Dry	TMF	TRS			0.12	12.49					92.1234454168586			-1.28	-1.525	0.14					0.86	1.64	0.000533	-0.14	-1.95	-4.27	-4.13	16.37931034	0.29940119760479	0.52						0.662337662337662	1.27758620652
Tabebuia	chrysantha	Bignoniaceae		W		D		Tropical Dry	TDF										44.7			-0.99	-1.49
Tabebuia	guayacan	Bignoniaceae				D			TMF										77.339477036038		0.721116072100007
Tabebuia	impetiginosa	Bignoniaceae	Angiosperm	T	E				TDF	TRS									65.7894736842105											2.646	0.000612						0.425531914893617	0.558						0.637662337662338
Tabebuia	ochracea	Bignoniaceae							TDF																												0.181488203266788	0.643						0.582467532467532
Tabebuia	rosea	Bignoniaceae				D			TMF										101.146325016858
Tabernaemontana	arborea	Apocynaceae				E			TMF										64.4639244774106		0.637638443280535
Tabernaemontana	grandiflora	Apocynaceae				E			TMF
Tachigali	bracteolata	Fabaceae		W		E		Tropical Moist	TMF													-0.993333332932692	-1.457453333
Tachigali	versicolor	Fabaceae				E			TMF										87.6039559451562		0.683413845650166
Tachigali	vulgaris	Fabaceae	Angiosperm	T	E				TS	TRS			0.3858	15.52					185.040806588067											4.6	0.000936666666666667	-2.895	-3.4	-4.235	-1.34	79.5296365675	0.534266133068528	0.622						0.596103896103896	10.81603057318
Tachigalia	versicolor		Angiosperm	T	E	E		Tropical Moist	TWF	TRR									112.359550561798			-1.955507622	-2.365707337							3.263598		-0.4	-1.6				1.19000019040003	0.58						0.623376623376623
Talisia	croatii	Sapindaceae				E			TMF
Talisia	microphylla	Sapindaceae		W		E		Tropical Moist	TMF													-1.69583333293269	-2.041933333
Talisia	nervosa	Sapindaceae				E			TMF
Tanaecium	pyramidatum	Bignoniaceae				E			TMF										53.6637446617217		0.663628757716675
Tanaecium	tetragonolobum	Bignoniaceae				E			TMF
Tapirira	guianensis	Anacardiaceae	Angiosperm	T	E	E		Tropical Moist	TWF	TRR				12.9					84.0336134453782			-1.825723328	-2.188606647							5.096234	0.001116	-0.5	-1.8				0.669998794002171	0.475	-1.45454334040815	-1.64546477144902	0.135444296869554	12.5360459123887	0.371048312006798	0.691558441558442		0.864555703130446
Tapura	capitulifera	Dichapetalaceae		W		E		Tropical Moist	TMF													-1.51666666626602	-1.842253333
Tecoma	capensis	Bignoniaceae	Angiosperm	S	E				G	TRR																				1.15847	0.00018	-0.8	-1.48	-2.6	-1.8	33.92857143	0.672793573475786								2.008571428656
Tectona	grandis	Lamiaceae							TMF
Terminalia		Combretaceae	Angiosperm	T	D				TS	TRS				17.52					121.139990365124	-24.863										2.49	0.000455303						0.4783659020785	0.588						0.618181818181818
Terminalia	amazonia	Combretaceae				D			TMF										106.450887839964		0.629999472274156
Terminalia	bellirica	Combretaceae	Angiosperm	T	D				TMF	TRS																												0.66						0.571428571428571
Terminalia	oblonga	Combretaceae				D			TMF										62.2611822881546		0.591671385089059
Ternstroemia	brasiliensis	Pentaphylacaceae		W		E		Tropical Dry	STF													-1.55	-1.88		9.27
Tetracera	hydrophila	Dilleniaceae				E			TMF
Tetracera	portobellensis	Dilleniaceae				E			TMF
Tetragastris	panamensis	Burseraceae				E			TMF										122.993931220499		0.501758271865002																1.08727450014286
Tetrapterys	tinifolia	Malpighiaceae							TMF
Tetrathylacium	johansenii	Salicaceae				E			TMF										60.3506405933918		0.713379907244182
Theobroma	cacao	Malvaceae				E			TMF
Theobroma	subincanum	Malvaceae		W		E		Tropical Moist	TMF													-1.95687500030048	-1.88714666675
Thevetia	ahouai	Apocynaceae				E			TMF										59.9011013710946		0.679225535021748
Thinouia	myriantha	Sapindaceae				E			TMF										80.8046752079119		0.512559098523993
Thouinia	paucidentata	Sapindaceae		W		D		Tropical Dry	TDF													-2.32	-3.295
Thouinidium	decandrum	Sapindaceae		W		E		Tropical Dry	TDF													-2.555	-3.335
Tibouchina	stenocarpa	Melastomataceae		W		D		Tropical Dry	TS										136			-1.32	-1.69	0.1	9.38				0.9
Timonius	timon	Rubiaceae	Angiosperm	T	E				TMF	TRR				8.674					84.9439999799668	-28.649										6.36	0.001159738						0.515360314163648	0.47						0.694805194805195
Titanodendron	hunsteinii	Araucariaceae	Gymnosperm	T	E					TRR																						-3.222542373	-4.07	-4.917457627	-1.694915254	44.84		0.5683735						0.630926298701299	7.299952
Tocoyena	formosa	Rubiaceae		W		D		Tropical Dry	TS										158			-2.38	-2.8	0.112	20.83				0.888
Tocoyena	pittieri	Rubiaceae				E			TMF										76.0845133737919		0.765280686990441
Toona	australis	Meliaceae	Angiosperm	T	E					TRR																					0.00016		-1.4
Toona	ciliata	Meliaceae	Angiosperm	T	D				TMF	TRS																												0.49						0.681818181818182
Toxicodendron	succedaneum	Anacardiaceae	Angiosperm	T	D			Tropical Moist	TMF	TRS			0.32525	13.00166667					74.5163022749689	-28.891			-1.59							3.205690948	0.000418686	-0.55	-1.51	-3.07	-2.52	24.35897436	0.655475514712148	0.590950932						0.616265628571429	1.471282051344
Trattinnickia	aspera	Burseraceae	Angiosperm	T	D	E		Tropical Moist	TWF	TRR				12.2					100.651831872331		0.453764932831911	-2.121411619	-2.53675004							2.384937	0.000774	-0.2	-1.1				0.64	0.555	-0.829903591857683	-0.929645157991615	0.13894375985528	7.7351488017981	0.167845164125352	0.63961038961039		0.86105624014472
Trema	micrantha	Cannabaceae				E			TMF										60.8162347879138		0.707313373408802
Trema	orientalis	Cannabaceae	Angiosperm	T	E				TWF	TRR			0.56																	5.87	0.00024						2.22222222222222	0.345333333333333						0.775757575757576
Triadica	sebifera	Euphorbiaceae	Angiosperm	T	D			Tropical Dry	TMF	TRS			0.34325	11.16958333					61.4089578324087	-29.705			-2.05							4.1802767395	0.0005318835	-0.48	-0.83	-1.56	-1.08	69.09090909	0.629516782917433	0.427964228						0.722101150649351	2.293818181788
Trichanthera	gigantea	Acanthaceae				E			TMF
Trichilia	dregeana	Meliaceae	Angiosperm	T	E				G	TRR																				2.46995	1e-04	-0.8	-2.66	-4.4	-3.6	21.83908046	2.54166423090511	0.482						0.687012987012987	2.323678160944
Trichilia	elegans	Meliaceae	Angiosperm	T	E				TDF	TRS									54.9450549450549											1.292	0.000243	-2.15	-3.5	-5.05	-2.9	24.51612903	0.602409638554217								3.4322580642
Trichilia	pallida	Meliaceae				E			TMF										58.7772533153518		0.625288024720952
Trichilia	rubra	Meliaceae							TWF
Trichilia	trifolia	Meliaceae		W		D		Tropical Dry	TDF													-1.805	-2.375
Trichilia	tuberculata	Meliaceae				E			TMF										94.8527759046977		0.525226629128294
Trichospermum		Malvaceae	Angiosperm	T	E				TWF	TRR			0.62																	7.66942	0.000297						2.22222222222222
Trichospermum	galeottii	Malvaceae				D			TMF										57.0914812317375		0.378882083761463
Trichostigma	octandrum	Phytolaccaceae	Angiosperm	L		E		Tropical Moist	TMF													-1.232376423	-1.49
Trichotosia	velutina	Orchidaceae		H				Tropical Moist														-0.35	-0.43	0.16289	8.7	0.09			0.83711
Trigonostemon	thyrsoideus	Euphorbiaceae	Angiosperm	W	E	E		Tropical Dry	TMF	TRS												-0.8585971865	-1.3511133335															0.62						0.597402597402597
Trimenia	neocaledonica	Trimeniaceae	Angiosperm			D		Tropical Moist															-1.15
Triplaris	cumingiana	Polygonaceae				E			TMF										86.9109163107814		0.726358206274409
Trophis	caucana	Moraceae				E			TMF										67.4308833445718		0.478194480878958
Trophis	racemosa	Moraceae				E			TMF										78.6693639020004		0.494777925034234
Turpinia	occidentalis	Staphyleaceae				E			TMF										86.7048775005619		0.694906621148823
Turpinia	pomifera	Staphyleaceae	Angiosperm	W	E	E		Tropical Dry	TDF	TRR												-1.295	-1.4							2.65	0.00050133	-0.48	-2.05	-3.62	-3.15	24.14200843	0.506329113924051	0.54						0.649350649350649	1.97964469126
Tynnanthus	croatianus	Bignoniaceae				E			TMF
Uncaria	tomentosa	Rubiaceae				E			TMF										63.3850303438975		0.649071301149097
UnidentifiedSpecies	NA								TWF
Unonopsis	pittieri	Annonaceae				E			TMF										73.2748932344347		0.556852755278845
Unonopsis	rufescens	Annonaceae		W		E		Tropical Moist	TMF													-1.4655555556891	-1.82330222233333
Urera	baccifera	Urticaceae				E			TMF
Varronia	inermis	Boraginaceae	Angiosperm	T	D				TDF	TRS									30.6522966243821											1.842397477	0.000248493						0.759249557737133
Varronia	macrocephala	Boraginaceae	Angiosperm	S	D				TDF	TRS									56.7515152006173											2.270660158	0.000341648						0.650491120796201
Vataireopsis	surinamensis	Fabaceae		W		E		Tropical Moist	TMF													-1.35916666706731	-1.761826667
Vatica		Dipterocarpaceae		W		E		Tropical Moist	TWF													-1.03	-1.16		9.19	0.321
Vatica	odorata	Dipterocarpaceae		W		D		Tropical Moist	TMF													-1	-1.27		20.27	0.779
Ventilago		Rhamnaceae	Angiosperm	T	E				TS	TRS				22.61					133.389560501213	-26.404										3.73	0.005189683						0.521311201935107	0.575						0.626623376623377
Vernonia	arborea	Asteraceae							TWF																												0.505129271175387
Virola	koschnyi	Myristicaceae							TWF										76.5696784073507																		0.706447737272727
Virola	michelii	Myristicaceae		W		E		Tropical Moist	TMF													-1.33458333293269	-1.741373333
Virola	multiflora	Myristicaceae				E			TMF										141.020454034614		0.696192182520495
Virola	sebifera	Myristicaceae	Angiosperm	T	E	E			TWF	TRR				13.5					107.597212856822		0.557856921434551										0.0010944							0.5						0.675324675324675
Virola	surinamensis	Myristicaceae				E			TMF										103.731175545066		0.888993876541869
Vismia	baccifera	Hypericaceae				E			TMF										90.8069229040234		0.652390120365506
Vismia	billbergiana	Hypericaceae				E			TMF
Vismia	tomentosa	Hypericaceae							TWF
Vochysia	ferruginea	Vochysiaceae	Angiosperm	T	E	E		Tropical Dry	TWF	TRR				18.3					81.3008130081301		0.553632731121258	-1.921250695	-2.301080569							3.16318	0.0016506	-0.1	-1				0.8	0.395						0.743506493506493
Vochysia	thyrsoidea	Vochysiaceae	Angiosperm	T	E				TS	TRS			99.27																								0.144015853265127	0.5						0.675324675324675
Vochysia	tucanorum	Vochysiaceae	Angiosperm	T	E				TS	TRS			173.57																								0.4801644082934	0.4995842						0.675594675324675
Vouacapoua	americana	Fabaceae		W		E		Tropical Moist	TMF													-1.68180555548878	-2.14674222233333
Widdringtonia	cedarbergensis	Cupressaceae	Gymnosperm	T	E					TRR																				0.59	0.000205938	-6.005	-10.09	-13.385	-7.38208689	18.755217049		0.522						0.661038961038961	7.5696056009764
Woodfordia	fruticosa	Lythraceae		W		E		Tropical Dry	P										49.3			-1.7	-2.17	0.24	6.55				0.76
Xanthophyllum		Polygalaceae		W		E		Tropical Moist	TMF										54			-1.59	-1.8		26.76	0.414
Xanthophyllum	flavescens	Polygalaceae	Angiosperm	T	E				TMF	TRS																												0.43						0.720779220779221
Xanthophyllum	hainanense	Polygalaceae	Angiosperm	T	E			Tropical Dry	TMF	TRS			0.05764	5.116					61.5852831806731	-30.511			-1.73							0.161553334	1.12822e-05	-0.57	-1.5	-3.76	-3.19	16.81415929	1.40133547270549	0.766231115						0.502447327922078	1.0088495574
Xanthophyllum	heteropleurum	Polygalaceae							TWF
Xylopia	macrantha	Annonaceae				E			TMF										79.3436727354462		0.464912838421897
Xylosma	oligandra	Salicaceae				E			TMF
Zanthoxylum	acuminatum	Rutaceae				D			TMF										103.731175545066		0.570399279650181
Zanthoxylum	ekmanii	Rutaceae				D			TMF										81.9566194650483		0.644376806712835
Zanthoxylum	monogynum	Rutaceae	Angiosperm	T	E				TDF	TRS									59.8802395209581											3.6	0.000594						0.598802395209581
Zanthoxylum	panamense	Rutaceae				D			TMF										94.021128343448		0.555356922291546
Zanthoxylum	setulosum	Rutaceae				D			TMF										67.880422566869
Ziziphus	mauritiana	Rhamnaceae		W		E		Tropical Dry	G													-1.52			6.2	0.077
Zuelania	guidonia	Salicaceae				D			TMF										76.0845133737919		0.508327392033898
Zygogynum	baillonii	Winteraceae	Angiosperm	T	E					TRS																						-2.21	-3	-4.07	-1.86	35.51401869									4.2616822428
Zygogynum	bailonii	Winteraceae	Angiosperm	T	E				TWF	TRR			0.088	6.87																0.54	0.00018						0.282485875706215
Zygogynum	bicolor	Winteraceae	Angiosperm	T	E					TRS																						-2.02	-2.3	-3.23	-1.21	40.86021505									3.7591397846
Zygogynum	crassifolium	Winteraceae	Angiosperm	T	E				TWF	TRR			0.078	7.21																0.31	6.9e-05	-3.35	-4.54	-5	-1.65	82.60869565	0.344827586206897	0.658949						0.572111038961039	15.00173913004
Zygogynum	pancheri	Winteraceae	Angiosperm	T	E					TRR																						-4.11	-5.2	-6.16	-2.05	39.58333333		0.627626						0.592450649350649	8.23333333264
Zygogynum	pommiferum	Winteraceae	Angiosperm	T	E					TRS																						-1.84	-3.45	-4.42	-2.58	39.17525773		0.574514						0.626938961038961	5.40618556674
[truncated: 11 more columns]
